# Supplementary material for: Rapid glycosylation of 2′-benzoylphenyl glycosides promoted by TfOH
Source: Royal Society of Chemistry journal article supplement (doi:10.1039/c9qo00629j), 2019-01-01
Supplement: c9qo00629j1.pdf [file c9qo00629j1.pdf]

## Electronic Supplementary Information

### Rapid Glycosylation of 2'-Benzoylphenyl Glycosides Promoted by TfOH

Da-Ke Liu<sup>†</sup>, De-Cai Xiong<sup>†</sup>, Xia Wu<sup>†</sup>, Qin Li<sup>\*†</sup> and Xin-Shan Ye<sup>\*†</sup>

<sup>†</sup>State Key Laboratory of Natural and Biomimetic Drugs, School of Pharmaceutical Sciences, Peking University,  
Beijing 100191, China

\*E-mail: xinshan@bjmu.edu.cn, liqin@bjmu.edu.cn.

#### Contents

|                                                         |    |
|---------------------------------------------------------|----|
| 1. Experimental Section .....                           | 1  |
| 1) Synthesis of the donors <b>3a-3f</b> .....           | 1  |
| 2) Substrate scope of the glycosylation reaction.....   | 4  |
| 2. <sup>1</sup> H and <sup>13</sup> C NMR Spectra ..... | 11 |
| 3. References.....                                      | 28 |

## 1. Experimental Section

All solvents were dried before use according to standard methods. Commercial reagents were used without further purification unless otherwise noted. Reactions were monitored by analytical thin-layer chromatography (TLC) on silica gel-coated aluminium plates (60 F<sub>254</sub>). Spots were detected under UV light (254 nm) and/or charring with a solution of (NH<sub>4</sub>)<sub>6</sub>Mo<sub>7</sub>O<sub>24</sub>•4H<sub>2</sub>O (24.00 g, 19.4 mmol) and Ce(NH<sub>4</sub>)<sub>2</sub>(NO<sub>3</sub>)<sub>6</sub> (0.50 g, 0.90 mmol) in sulfuric acid (5%, 500 mL). Column chromatography was performed on silica gel (200-300 mesh). <sup>1</sup>H NMR spectra were recorded at room temperature in CDCl<sub>3</sub> with TMS (δ = 0 ppm) as internal standard. <sup>13</sup>C NMR spectra were obtained by using the same NMR spectrometer and were calibrated with CDCl<sub>3</sub> (δ = 77.00 ppm). The following standard abbreviations are used to indicate multiplicity: s = singlet, d = doublet, t = triplet, q = quartet, m = multiplet, dd = doublet of doublets, dt = doublet of triplets, and br = broad. High resolution mass spectra were performed on a Waters Xevo G2 Q-TOF mass spectrometer.

### 1) Synthesis of the donors 3a-3f

#### 2'-Benzoylphenyl 2,3,4,6-tetra-O-benzyl-β-D-glucopyranoside (3a)

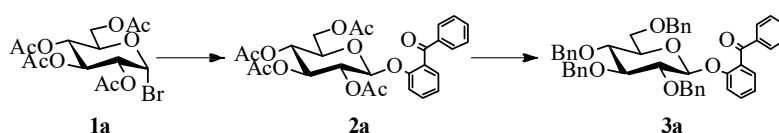

To a solution of **1a** (14.84 mmol, 6.10 g) in dichloromethane (DCM) (60 mL) and water (52.5 mL), 2-hydroxybenzophenone (29.68 mmol, 5.8 g), 2M NaOH solution (7.5 mL) and tetrabutylammonium bromide (14.84 mmol, 4.70 g) were added. The reaction mixture was stirred at room temperature for 6 h and monitored by TLC. The reaction mixture was extracted with DCM for three times. The combined organic phase was washed with water and brine, dried over Na<sub>2</sub>SO<sub>4</sub>, filtered and the filtrate was concentrated under reduced pressure. The crude product was purified by column chromatography on silica gel (petroleum ether: ethyl acetate = 3:1, v/v) to afford **2a** as a white solid (4.00 g, 51%). <sup>1</sup>H NMR (400 MHz, CDCl<sub>3</sub>) δ 7.78 (dd, *J* = 8.4, 0.9 Hz, 2H), 7.57 (t, *J* = 7.4 Hz, 1H), 7.47 – 7.41 (m, 3H), 7.33 (dd, *J* = 7.5, 1.6 Hz, 1H), 7.24 – 7.16 (m, 2H), 5.18 (t, *J* = 9.3 Hz, 1H), 5.10 – 5.00 (m, 2H), 4.93 (dd, *J* = 9.3, 7.9 Hz, 1H), 4.26 (dd, *J* = 12.3, 5.3 Hz, 1H), 4.15 (dd, *J* = 12.2, 2.4 Hz, 1H), 3.85 – 3.78 (m, 1H), 2.09 (s, 3H), 2.02 (s, 3H), 1.95 (s, 3H), 1.90 (s, 3H). <sup>13</sup>C NMR (101 MHz, CDCl<sub>3</sub>) δ 195.32, 170.50, 170.10, 169.32, 168.96, 153.95, 137.01, 133.38, 131.40, 131.07, 129.98, 128.99, 128.34, 123.53, 117.20, 99.74, 72.61, 72.00, 70.60, 68.18, 61.92, 20.70, 20.56, 20.52, 20.36. HRMS (ESI): Calcd for C<sub>27</sub>H<sub>32</sub>NO<sub>11</sub> [M+NH<sub>4</sub>]<sup>+</sup> 546.1970, found 546.1971.

To a solution of **2a** (7.56 mmol, 4.00 g) in dry MeOH (60 mL), NaOMe was added until the pH was 10. The reaction mixture was stirred at room temperature for 1 h, neutralized with acidic resin, filtered and the filtrate was concentrated. The residue was dissolved in DMF (40 mL), stirred in an ice bath, 60% sodium hydride (1.36 g, 45.36 mmol) was added at 0 °C, benzyl bromide (5.4 mL, 45.36 mmol) was then added dropwise. The reaction mixture was stirred for 12 h at room temperature, monitored by TLC, quenched by dropwise addition of methanol at 0 °C. The solvent was evaporated and concentrated. The residue was extracted with DCM for three times and the organic

phases were combined. The combined organic phase was washed with water and brine, dried over Na<sub>2</sub>SO<sub>4</sub>, filtered and the filtrate was concentrated under reduced pressure. The crude product was purified by column chromatography on silica gel (petroleum ether: ethyl acetate = 8:1, v/v) to afford **3a** as colorless oil (5.18 g, 95%). <sup>1</sup>H NMR (400 MHz, CDCl<sub>3</sub>) δ 7.83 (d, *J* = 7.2 Hz, 2H), 7.49 (t, *J* = 7.4 Hz, 1H), 7.45 – 7.39 (m, 2H), 7.35 (t, *J* = 7.8 Hz, 4H), 7.31 – 7.10 (m, 20H), 5.02 (d, *J* = 7.7 Hz, 1H), 4.84 (d, *J* = 10.9 Hz, 1H), 4.79 (d, *J* = 10.9 Hz, 1H), 4.73 (d, *J* = 10.9 Hz, 1H), 4.57 (d, *J* = 12.0 Hz, 1H), 4.54 (d, *J* = 11.6 Hz, 2H), 4.48 (d, *J* = 11.3 Hz, 1H), 4.31 (d, *J* = 10.9 Hz, 1H), 3.75 (d, *J* = 10.90 Hz, 1H), 3.70 – 3.62 (m, 2H), 3.59 – 3.52 (m, 2H), 3.31 (dd, *J* = 8.7, 8.0 Hz, 1H). <sup>13</sup>C NMR (101 MHz, CDCl<sub>3</sub>) δ 196.02, 154.46, 138.51, 138.31, 138.18, 138.10, 137.78, 133.18, 132.03, 130.23, 129.99, 129.75, 128.53, 128.46, 128.36, 128.24, 128.05, 127.93, 127.89, 127.75, 127.72, 127.70, 127.08, 122.41, 115.60, 100.70, 84.59, 81.85, 77.73, 75.79, 75.38, 75.12, 74.91, 73.54, 68.95. HRMS (ESI): Calcd for C<sub>47</sub>H<sub>48</sub>NO<sub>7</sub> [M+NH<sub>4</sub>]<sup>+</sup> 738.3430, found 738.3431.

### 2'-Benzoylphenyl 2,3,4,6-tetra-*O*-benzyl-β-D-galactopyranoside (**3b**)

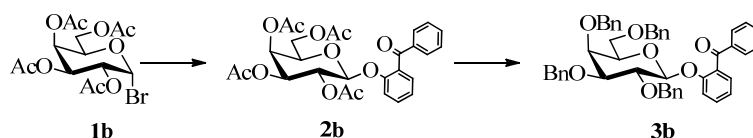

The same procedure for the synthesis of **3a** was applied, yielding **3b** (0.64 g, 71%) as colorless oil. <sup>1</sup>H NMR (400 MHz, CDCl<sub>3</sub>) δ 7.85 – 7.74 (m, 2H), 7.52 – 7.37 (m, 3H), 7.34 – 7.24 (m, 17H), 7.24 – 7.19 (m, 4H), 7.19 – 7.13 (m, 2H), 7.10 (t, *J* = 7.4 Hz, 1H), 4.96 (d, *J* = 7.6 Hz, 1H), 4.91 (d, *J* = 11.6 Hz, 1H), 4.73 – 4.63 (m, 2H), 4.55 (d, *J* = 11.6 Hz, 1H), 4.50 – 4.39 (m, 3H), 4.36 (d, *J* = 10.7 Hz, 1H), 3.86 (d, *J* = 2.8 Hz, 1H), 3.69 – 3.64 (m, 1H), 3.63 (d, *J* = 2.9 Hz, 1H), 3.60 (d, *J* = 5.4 Hz, 1H), 3.60 – 3.55 (m, 1H), 3.52 (dd, *J* = 9.7, 2.9 Hz, 1H). <sup>13</sup>C NMR (101 MHz, CDCl<sub>3</sub>) δ 196.04, 154.65, 138.74, 138.53, 138.44, 138.05, 137.78, 133.07, 131.88, 130.26, 129.76, 128.58, 128.50, 128.38, 128.35, 128.27, 128.17, 127.97, 127.95, 127.75, 127.69, 127.57, 122.22, 115.79, 101.20, 82.03, 78.89, 77.48, 76.84, 75.23, 74.62, 74.10, 73.73, 73.69, 73.27, 69.05. HRMS (ESI): Calcd for C<sub>47</sub>H<sub>48</sub>NO<sub>7</sub> [M+NH<sub>4</sub>]<sup>+</sup> 738.3431, found 738.3425.

### 2'-Benzoylphenyl 2,3,4,6-tetra-*O*-benzyl-β-D-glucopyranoside (**3c**)

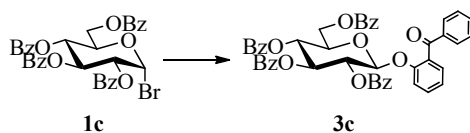

To a solution of **1c** (6.44 mmol, 4.25 g) in DCM (40 mL) and water (32.5 mL), 2-hydroxybenzophenone (12.88 mmol, 2.55 g), 2M NaOH solution (7.5 mL) and tetrabutylammonium bromide (12.88 mmol, 4.08 g) were added under an atmosphere of argon. The reaction mixture was stirred at room temperature for 6 h and monitored by TLC, extracted with DCM for three times. The combined organic phase was washed with water and brine, dried over Na<sub>2</sub>SO<sub>4</sub>, filtered and the filtrate was concentrated under reduced pressure. The crude product was purified by column chromatography on silica gel (petroleum ether: ethyl acetate = 6:1, v/v) to afford **3c** as a white solid (4.00 g, 48%).

$^1\text{H}$  NMR (400 MHz,  $\text{CDCl}_3$ )  $\delta$  8.04 (d,  $J = 7.5$  Hz, 2H), 7.90 (d,  $J = 7.6$  Hz, 2H), 7.81 – 7.56 (m, 4H), 7.56 (d,  $J = 7.7$  Hz, 3H), 7.52 – 7.15 (m, 17H), 7.11 (t,  $J = 7.4$  Hz, 1H), 5.89 (t,  $J = 9.3$  Hz, 1H), 5.62 (t,  $J = 9.6$  Hz, 1H), 5.52 – 5.35 (m, 2H), 4.64 (dd,  $J = 12.1, 3.0$  Hz, 1H), 4.51 (dd,  $J = 12.1, 6.4$  Hz, 1H), 4.32 – 4.25 (m, 1H).  $^{13}\text{C}$  NMR (101 MHz,  $\text{CDCl}_3$ )  $\delta$  195.19, 166.04, 165.70, 165.26, 164.54, 153.83, 136.90, 133.59, 133.30, 133.13, 131.41, 131.36, 129.91, 129.84, 129.80, 129.79, 129.64, 129.25, 129.07, 128.73, 128.50, 128.31, 128.17, 123.67, 117.73, 99.91, 72.86, 72.63, 71.35, 69.57, 63.17. HRMS (ESI): Calcd for  $\text{C}_{47}\text{H}_{40}\text{NO}_{11}$   $[\text{M}+\text{NH}_4]^+$  794.2601, found 794.2592.

**2'-Benzoylphenyl 2,3,4,6-tetra-*O*-benzoyl- $\beta$ -D-galactopyranoside (3d)**

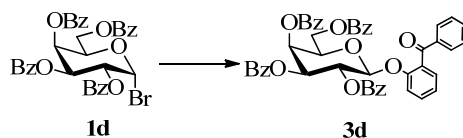

The same procedure for the synthesis of **3c** was applied, yielding **3d** (0.64 g, 71%) as a white solid.  $^1\text{H}$  NMR (400 MHz,  $\text{CDCl}_3$ )  $\delta$  8.08 – 8.00 (m, 4H), 7.81 – 7.70 (m, 2H), 7.64 – 7.56 (m, 2H), 7.64 – 7.56 (m, 4H), 7.51 – 7.43 (m, 6H), 7.42 – 7.17 (m, 10H), 7.14 (t,  $J = 7.4$  Hz, 1H), 5.98 (d,  $J = 3.0$  Hz, 1H), 5.74 (dd,  $J = 10.3, 7.9$  Hz, 1H), 5.57 (dd,  $J = 10.4, 3.4$  Hz, 1H), 5.36 (d,  $J = 7.9$  Hz, 1H), 4.64 (dd,  $J = 11.3, 7.5$  Hz, 1H), 4.53 – 4.39 (m, 2H).  $^{13}\text{C}$  NMR (101 MHz,  $\text{CDCl}_3$ )  $\delta$  195.28, 166.07, 165.60, 165.56, 164.67, 153.86, 136.93, 133.77, 133.50, 133.41, 133.18, 133.11, 131.44, 131.38, 130.14, 129.91, 129.85, 129.52, 129.32, 129.14, 128.91, 128.73, 128.67, 128.62, 128.36, 128.24, 128.13, 123.70, 117.82, 100.27, 71.92, 71.81, 69.06, 67.98, 62.36. HRMS (ESI): Calcd for  $\text{C}_{47}\text{H}_{40}\text{NO}_{11}$   $[\text{M}+\text{NH}_4]^+$  794.2601, found 794.2599.

**2'-Benzoylphenyl 2,3,4,6-tetra-*O*-benzoyl- $\alpha$ -D-mannopyranoside (3e)**

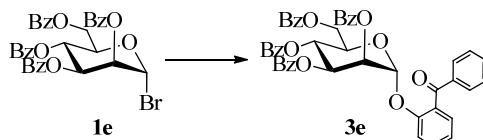

To a solution of **1e** (6.44 mmol, 4.25 g) in DCM (40 mL), 2-hydroxybenzophenone (12.88 mmol, 2.55 g) and activated 4 Å molecular sieves (4.00 g) were added under an argon atmosphere. After cooling to 0 °C, AgOTf (1.99 g, 7.73 mmol) was added. The reaction mixture was stirred for 4 h at room temperature, monitored by TLC, quenched by dropwise addition of  $\text{Et}_3\text{N}$  at 0 °C, filtered through Celite and concentrated in vacuum. The crude product was purified by column chromatography on silica gel (petroleum ether: ethyl acetate = 6:1, v/v) to afford **3e** as a white solid (5.00 g, 60%).  $^1\text{H}$  NMR (400 MHz,  $\text{CDCl}_3$ )  $\delta$  8.08 – 7.99 (m, 4H), 7.97 – 7.89 (m, 4H), 7.79 (d,  $J = 7.2$  Hz, 2H), 7.62 – 7.50 (m, 7H), 7.44 – 7.36 (m, 8H), 7.32 (d,  $J = 8.3$  Hz, 1H), 7.28 – 7.22 (m, 2H), 7.20 (t,  $J = 7.4$  Hz, 1H), 6.00 (t,  $J = 9.8$  Hz, 1H), 5.76 (s, 1H), 5.31 – 5.24 (m, 2H), 4.56 (dd,  $J = 12.2, 2.5$  Hz, 1H), 4.40 (dd,  $J = 12.2, 5.0$  Hz, 1H), 4.31 – 4.24 (m, 1H).  $^{13}\text{C}$  NMR (101 MHz,  $\text{CDCl}_3$ )  $\delta$  196.29, 166.09, 165.50, 165.31, 164.75, 153.63, 138.74, 133.70, 133.63, 133.19, 133.18, 133.08, 132.51, 130.27, 130.00, 129.95, 129.93, 129.85, 129.83, 129.74, 129.49, 129.17, 128.97, 128.80, 128.73, 128.55, 128.50, 128.38, 123.18, 115.01, 96.00, 70.01, 69.93, 69.34, 66.58, 62.72. HRMS (ESI): Calcd for  $\text{C}_{47}\text{H}_{40}\text{NO}_{11}$   $[\text{M}+\text{NH}_4]^+$  794.2596, found 794.2593.

### 2'-Benzoylphenyl 2,3,4-tri-*O*-benzoyl- $\alpha$ -L-rhamnopyranoside (**3f**)

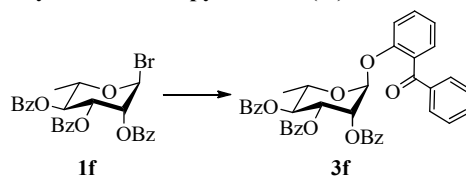

The same procedure for the synthesis of **3e** was applied, yielding **3f** (3.09 g, 60%) as a white solid.  $^1\text{H}$  NMR (400 MHz,  $\text{CDCl}_3$ )  $\delta$  7.91 (dd,  $J = 8.3, 1.2$  Hz, 2H), 7.82 (dd,  $J = 8.3, 1.2$  Hz, 2H), 7.73 (dd,  $J = 8.4, 1.3$  Hz, 2H), 7.63 – 7.56 (m, 3H), 7.54 – 7.47 (m, 2H), 7.44 – 7.34 (m, 6H), 7.27 – 7.10 (m, 7H), 5.68 – 5.66 (m, 1H), 5.55 – 5.48 (m, 2H), 5.40 (d,  $J = 1.1$  Hz, 1H), 3.96 – 3.86 (m, 1H), 1.47 (d,  $J = 6.2$  Hz, 3H).  $^{13}\text{C}$  NMR (101 MHz,  $\text{CDCl}_3$ )  $\delta$  195.86, 165.65, 165.58, 164.95, 154.14, 137.33, 133.55, 133.30, 133.15, 133.04, 131.97, 131.19, 130.19, 129.92, 129.88, 129.84, 129.56, 129.40, 129.22, 128.98, 128.73, 128.59, 128.36, 128.34, 128.11, 123.72, 116.61, 97.62, 71.62, 71.33, 71.23, 69.43, 17.93. HRMS (ESI): Calcd for  $\text{C}_{40}\text{H}_{32}\text{NO}_9$   $[\text{M}+\text{NH}_4]^+$  674.2390, found 674.2388.

## 2) Substrate scope of the glycosylation reaction

### Methyl 2,3,4-tri-*O*-benzyl-6-*O*-(2,3,4,6-tetra-*O*-benzyl- $\alpha/\beta$ -D-glucopyranosyl)- $\alpha$ -D-glucopyranoside (**5a**)

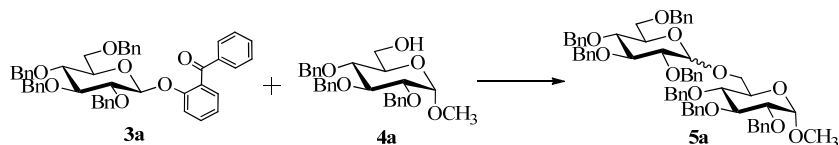

A dried flask fitted with a magnetic stir-bar was charged with donor **3a** (30.0 mg, 0.042 mmol), acceptor **4a** (16.3 mg, 0.035 mmol), activated 4Å molecular sieves (200.0 mg) and  $\text{CH}_2\text{Cl}_2$  (2.0 mL) under an argon atmosphere. Then TfOH (1.2 equiv., 0.042 mmol) was added, the reaction mixture was stirred at room temperature for 10 min, monitored by TLC, quenched by dropwise addition of  $\text{Et}_3\text{N}$  (0.1 mL) at 0 °C, then filtered through Celite and concentrated in vacuum. The crude product was purified by column chromatography on silica gel (petroleum ether: ethyl acetate = 9:1, v/v) to afford **5a** as a white solid (31.1 mg, 90%,  $\alpha/\beta = 1.8:1.0$ ). The  $^1\text{H}$  NMR data for **5a** are in accordance with those reported previously. $^1$   $^1\text{H}$  NMR (400 MHz,  $\text{CDCl}_3$ )  $\delta$  7.47 – 6.99 (m, 52.01H), 4.98 – 4.95 (m, 3.18H), 4.92 – 4.89 (m, 1.86H), 4.83 – 4.38 (m, 18.37H), 4.34 (d,  $J = 7.8$  Hz, 1H), 4.17 (d,  $J = 9.1$  Hz, 1H), 4.03 – 3.91 (m, 2H), 3.83 – 3.41 (m, 15.52H), 3.35 (s, 1.49H), 3.32 (s, 2.61H).

### Methyl 2,3,6-tri-*O*-benzyl-4-*O*-(2,3,4,6-tetra-*O*-benzyl- $\alpha/\beta$ -D-glucopyranosyl)- $\alpha$ -D-glucopyranoside (**5b**)

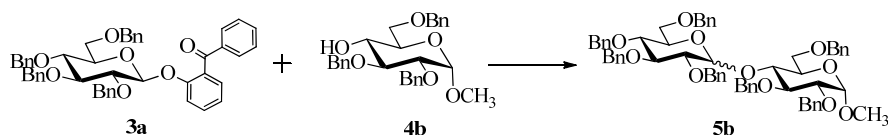

The reaction of donor **3a** (30.0 mg, 0.042 mmol) and acceptor **4b** (16.3 mg, 0.035 mmol) was performed as described in the synthesis of **5a**, affording **5b** (eluent: petroleum ether/ethyl acetate = 6: 1 (v/v); 20.7 mg, 69%,  $\alpha/\beta = 2.5:1.0$ ). The  $^1\text{H}$  NMR data for **5b** are in accordance with those reported previously. $^1$   $^1\text{H}$  NMR (400 MHz,  $\text{CDCl}_3$ )  $\delta$  7.43 – 7.08 (m, 49.35H), 5.69 (d,  $J = 3.5$  Hz, 1H), 5.09 (d,  $J = 10.9$  Hz, 0.4H), 5.03 (d,  $J = 11.6$  Hz, 1H), 4.91 –

4.72 (m, 6.95H), 4.69 (d,  $J = 12.5$  Hz, 1.48H), 4.62 – 4.34 (m, 11.84H), 4.29 (d,  $J = 12.2$  Hz, 1H), 4.18 – 3.79 (m, 7.07H), 3.76 – 3.40 (m, 10.76H), 3.37 (s, 3.09H), 3.36 (s, 1.23H), 3.32 – 3.25 (m, 0.54H).

**Methyl 2-*O*-benzyl-4,6-*O*-benzylidene-3-*O*-(2,3,4,6-tetra-*O*-benzoyl- $\alpha$ / $\beta$ -D-glucopyranosyl)- $\alpha$ -D-glucopyranoside (**5c**)**

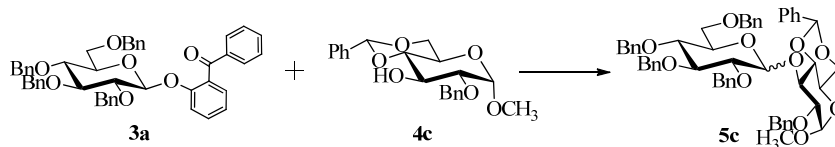

The reaction of donor **3a** (30.0 mg, 0.042 mmol) and acceptor **4c** (13.0 mg, 0.035 mmol) was performed as described in the synthesis of **5a**, affording **5c** (eluent: petroleum ether/ethyl acetate = 6: 1 (v/v); 23.5 mg, 75%,  $\alpha/\beta = 2.0:1.0$ ,  $\alpha$ -isomer: 15.7 mg, 50%;  $\beta$ -isomer: 7.8 mg, 25%). The  $^1\text{H}$  NMR data for **5c** are in accordance with those reported previously.<sup>1</sup>  **$\alpha$ -isomer:**  $^1\text{H}$  NMR (400 MHz,  $\text{CDCl}_3$ )  $\delta$  7.43 – 7.11 (m, 28H), 6.92 (d,  $J = 7.1$  Hz, 2H), 5.59 (d,  $J = 3.6$  Hz, 1H), 5.46 (s, 1H), 4.99 (d,  $J = 10.8$  Hz, 1H), 4.81 (d,  $J = 3.7$  Hz, 1H), 4.78 (d,  $J = 3.9$  Hz, 1H), 4.71 (d,  $J = 3.7$  Hz, 1H), 4.65 (d,  $J = 11.4$  Hz, 1H), 4.61 – 4.53 (m, 3H), 4.42 – 4.34 (m, 2H), 4.30 (t,  $J = 12.3$  Hz, 2H), 4.26 – 4.17 (m, 2H), 3.96 (t,  $J = 9.4$  Hz, 1H), 3.92 – 3.83 (m, 1H), 3.78 (t,  $J = 9.3$  Hz, 1H), 3.73 – 3.63 (m, 3H), 3.53 – 3.43 (m, 3H), 3.41 (s, 3H).  **$\beta$ -isomer:**  $^1\text{H}$  NMR (400 MHz,  $\text{CDCl}_3$ )  $\delta$  7.43 – 7.39 (m, 2H), 7.38 – 7.20 (m, 26H), 7.17 – 7.12 (m, 2H), 5.46 (s, 1H), 5.06 (d,  $J = 11.3$  Hz, 1H), 4.95 – 4.86 (m, 2H), 4.81 – 4.68 (m, 4H), 4.53 (d,  $J = 10.7$  Hz, 1H), 4.50 – 4.43 (m, 4H), 4.36 (t,  $J = 9.1$  Hz, 1H), 4.21 (dd,  $J = 10.1, 4.6$  Hz, 1H), 3.86 – 3.77 (m, 1H), 3.71 – 3.54 (m, 7H), 3.49 (t,  $J = 8.1$  Hz, 1H), 3.35 (s, 3H), 3.28 – 3.22 (m, 1H).

**Methyl 3-*O*-benzyl-4,6-*O*-benzylidene-2-*O*-(2,3,4,6-tetra-*O*-benzyl- $\alpha$ / $\beta$ -D-glucopyranosyl)- $\alpha$ -D-glucopyranoside (**5d**)**

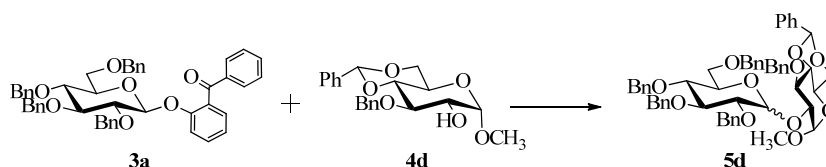

The reaction of donor **3a** (30.0 mg, 0.042 mmol) and acceptor **4d** (13.0 mg, 0.035 mmol) was performed as described in the synthesis of **5a**, affording **5d** (eluent: petroleum ether/ethyl acetate = 6: 1 (v/v); 25.7 mg, 82%,  $\alpha/\beta = 2.6:1.0$ ,  $\alpha$ -isomer: 18.6 mg, 59%;  $\beta$ -isomer: 7.1 mg, 23%). The  $^1\text{H}$  NMR data for **5d** are in accordance with those reported previously.<sup>1</sup>  **$\alpha$ -isomer:**  $^1\text{H}$  NMR (400 MHz,  $\text{CDCl}_3$ )  $\delta$  7.52 – 7.50 (m, 2H), 7.42 – 7.23 (m, 20H), 7.25 – 7.23 (m, 3H), 7.15 – 7.10 (m, 3H), 7.05 – 7.01 (m, 2H), 5.57 (s, 1H), 5.02 (d,  $J = 10.8$  Hz, 1H), 4.92 (d,  $J = 3.6$  Hz, 1H), 4.89 – 4.69 (m, 7H), 4.53 (d,  $J = 12.1$  Hz, 1H), 4.45 (d,  $J = 11.2$  Hz, 1H), 4.33 – 4.27 (m, 2H), 4.17 – 4.08 (m, 3H), 3.90 – 3.83 (m, 2H), 3.78 – 3.57 (m, 4H), 3.50 – 3.45 (m, 4H), 3.41 – 3.37 (m, 1H).  **$\beta$ -isomer:**  $^1\text{H}$  NMR (400 MHz,  $\text{CDCl}_3$ )  $\delta$  7.46 (dd,  $J = 6.6$  Hz, 3.1 Hz, 2H), 7.38 – 7.13 (m, 28H), 5.56 (s, 1H), 5.04 (d,  $J = 11.5$  Hz, 1H), 4.96 (d,  $J = 3.6$  Hz, 1H), 4.92 (d,  $J = 10.9$  Hz, 1H), 4.82 – 4.74 (m, 5H), 4.65 (d,  $J = 10.8$  Hz, 1H), 4.57 (d,  $J = 12.0$  Hz,

1H), 4.52 (d,  $J = 5.6$  Hz, 1H), 4.49 (d,  $J = 6.9$  Hz, 1H), 4.31 (dd,  $J = 10.1, 4.8$  Hz, 1H), 4.10 (t,  $J = 9.0$  Hz, 1H), 3.94 – 3.83 (m, 2H), 3.76 (t,  $J = 10.6$  Hz, 1H), 3.68 – 3.50 (m, 6H), 3.43 – 3.38 (m, 4H).

**Methyl 2,3,4-tri-*O*-benzyl-6-*O*-(2,3,4,6-tetra-*O*-benzyl- $\alpha$ / $\beta$ -D-galactopyranosyl)- $\alpha$ -D-glucopyranoside (5e)**

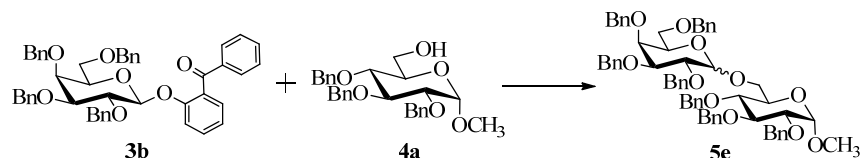

The reaction of donor **3b** (30.0 mg, 0.042 mmol) and acceptor **4a** (16.3 mg, 0.035 mmol) was performed as described in the synthesis of **5a**, affording **5e** (eluent: petroleum ether/ethyl acetate = 9: 1 (v/v); 31.4 mg, 91%,  $\alpha/\beta = 1.9:1.0$ ). The  $^1\text{H}$  NMR data for **5e** are in accordance with those reported previously.<sup>2</sup>  $^1\text{H}$  NMR (400 MHz,  $\text{CDCl}_3$ )  $\delta$  7.40 – 7.13 (m, 53.2H), 4.99 (d,  $J = 3.5$  Hz, 1H), 4.98 – 4.90 (m, 3.77H), 4.87 – 4.73 (m, 5.35H), 4.73 – 4.62 (m, 6.37H), 4.60 – 4.51 (m, 5.8H), 4.50 – 4.27 (m, 4.5H), 4.14 (dd,  $J = 10.7, 1.7$  Hz, 0.54H), 4.06 – 3.69 (m, 11.15H), 3.64 – 3.38 (m, 8.62H), 3.29 (d,  $J = 2.2$  Hz, 4.56H).

**Methyl 2,3,6-tri-*O*-benzyl-4-*O*-(2,3,4,6-tetra-*O*-benzyl- $\alpha$ / $\beta$ -D-galactopyranosyl)- $\alpha$ -D-glucopyranoside (5f)**

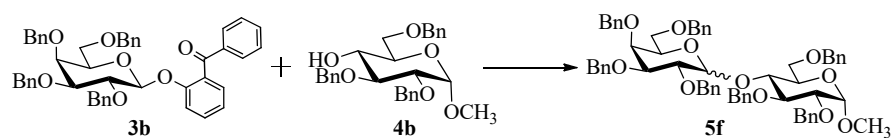

The reaction of donor **3b** (30.0 mg, 0.042 mmol) and acceptor **4b** (13.0 mg, 0.035 mmol) was performed as described in the synthesis of **5a**, affording **5f** (eluent: petroleum ether/ethyl acetate = 6: 1 (v/v); 24.5 mg, 71%,  $\alpha/\beta = 3.1:1.0$ ). The  $^1\text{H}$  NMR data for **5f** are in accordance with those reported previously.<sup>2</sup>  $^1\text{H}$  NMR (400 MHz,  $\text{CDCl}_3$ )  $\delta$  7.38 – 7.11 (m, 46.2H), 5.75 (d,  $J = 3.8$  Hz, 1H), 5.03 (d,  $J = 10.7$  Hz, 0.32H), 4.96 (d,  $J = 11.5$  Hz, 1H), 4.86 (d,  $J = 11.4$  Hz, 1H), 4.84 – 4.76 (m, 2H), 4.77 – 4.50 (m, 11.15H), 4.42 (d,  $J = 12.3$  Hz, 1.12H), 4.40 – 4.26 (m, 2.05H), 4.23 (d,  $J = 11.6$  Hz, 1.13H), 4.09 – 4.03 (t,  $J = 10.7$  Hz, 1H), 4.01 – 3.79 (m, 7.41H), 3.78 – 3.40 (m, 7.62H), 3.37 (d,  $J = 2.3$  Hz, 3.65H), 3.35 – 3.28 (m, 0.88H).

**Methyl 2-*O*-benzyl-4,6-*O*-benzylidene-3-*O*-(2,3,4,6-tetra-*O*-benzyl- $\alpha$ / $\beta$ -D-galactopyranosyl)- $\alpha$ -D-glucopyranoside (5g)**

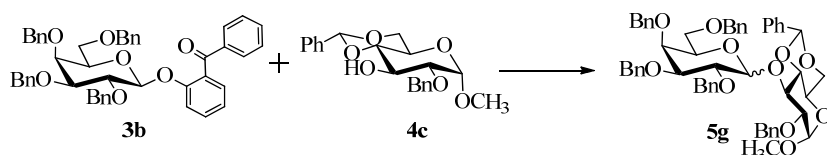

The reaction of donor **3b** (30.0 mg, 0.042 mmol) and acceptor **4c** (13.0 mg, 0.035 mmol) was performed as described in the synthesis of **5a**, affording **5g** (eluent: petroleum ether/ethyl acetate = 6: 1 (v/v); 23.8 mg, 76%,  $\alpha/\beta = 3.5:1.0$ ,  $\alpha$ -isomer: 18.5 mg, 59%;  $\beta$ -isomer: 5.3 mg, 17%). The  $^1\text{H}$  NMR data for **5g** are in accordance with those

reported previously.<sup>2</sup>  **$\alpha$ -isomer:** <sup>1</sup>H NMR (400 MHz, CDCl<sub>3</sub>)  $\delta$  7.42 – 7.20 (m, 25H), 7.16 (t,  $J$  = 7.2 Hz, 1H), 7.09 (t,  $J$  = 7.4 Hz, 2H), 7.02 (d,  $J$  = 7.3 Hz, 2H), 5.61 (d,  $J$  = 3.4 Hz, 1H), 5.43 (s, 1H), 4.88 (d,  $J$  = 11.1 Hz, 1H), 4.85 (d,  $J$  = 11.1 Hz, 1H), 4.74 (d,  $J$  = 11.6 Hz, 1H), 4.71 (d,  $J$  = 12.0 Hz, 1H), 4.61 – 4.49 (m, 4H), 4.44 (d,  $J$  = 12.3 Hz, 1H), 4.40 – 4.30 (m, 4H), 4.21 (dd,  $J$  = 10.1, 4.6 Hz, 1H), 4.02 – 3.90 (m, 3H), 3.87 – 3.78 (m, 1H), 3.74 (t,  $J$  = 9.4 Hz, 1H), 3.68 (t,  $J$  = 10.2 Hz, 1H), 3.64 – 3.57 (m, 2H), 3.54 (t,  $J$  = 8.5 Hz, 1H), 3.33 (s, 3H).  **$\beta$ -isomer:** <sup>1</sup>H NMR (400 MHz, CDCl<sub>3</sub>)  $\delta$  7.47 – 7.43 (m, 2H), 7.37 – 7.22 (m, 26H), 7.20 – 7.17 (m, 2H), 5.50 (s, 1H), 5.03 (d,  $J$  = 11.0 Hz, 1H), 4.93 (d,  $J$  = 11.6 Hz, 1H), 4.81 – 4.76 (m, 3H), 4.68 (s, 2H), 4.60 (d,  $J$  = 11.7 Hz, 1H), 4.51 (d,  $J$  = 12.1 Hz, 1H), 4.44 (d,  $J$  = 3.8 Hz, 1H), 4.33 (t,  $J$  = 8.6 Hz, 1H), 4.26 (d,  $J$  = 13.3 Hz, 1H), 4.23 – 4.16 (m, 1H), 3.89 – 3.80 (m, 3H), 3.71 – 3.56 (m, 4H), 3.48 (dd,  $J$  = 9.7, 2.9 Hz, 1H), 3.42 – 3.31 (m, 2H), 3.34 (s, 3H).

**Methyl 2,3,4-tri-*O*-benzyl-6-*O*-(2,3,4,6-tetra-*O*-benzoyl- $\beta$ -D-glucopyranosyl)- $\alpha$ -D-glucopyranoside (**5h**)**

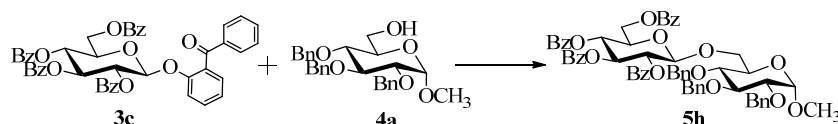

The reaction of donor **3c** (32.6 mg, 0.042 mmol) and acceptor **4a** (16.3 mg, 0.035 mmol) was performed as described in the synthesis of **5a**, affording **5h** (eluent: petroleum ether/ethyl acetate = 5: 1 (v/v); 28.47 mg, 78%). The <sup>1</sup>H NMR data for **5h** are in accordance with those reported previously.<sup>3</sup> <sup>1</sup>H NMR (400 MHz, CDCl<sub>3</sub>)  $\delta$  8.01 – 7.97 (m, 2H), 7.92 – 7.86 (m, 4H), 7.84 – 7.80 (m, 2H), 7.56 – 7.46 (m, 2H), 7.45 – 7.18 (m, 23H), 7.07 – 7.03 (m, 2H), 5.89 (t,  $J$  = 9.6 Hz, 1H), 5.67 (t,  $J$  = 9.7 Hz, 1H), 5.59 (dd,  $J$  = 9.7, 7.8 Hz, 1H), 4.89 (d,  $J$  = 10.9 Hz, 1H), 4.82 (d,  $J$  = 7.8 Hz, 1H), 4.73 (d,  $J$  = 12.1 Hz, 1H), 4.68 (d,  $J$  = 11.0 Hz, 1H), 4.63 – 4.57 (m, 2H), 4.54 – 4.47 (m, 3H), 4.28 (d,  $J$  = 11.2 Hz, 1H), 4.18 – 4.07 (m, 2H), 3.88 (t,  $J$  = 9.2 Hz, 1H), 3.77 – 3.69 (m, 2H), 3.43 (dd,  $J$  = 9.7, 3.5 Hz, 1H), 3.37 (t,  $J$  = 9.4 Hz, 1H), 3.21 (s, 3H).

**Methyl 2,3,4-tri-*O*-benzyl-6-*O*-(2,3,4,6-tetra-*O*-benzoyl- $\beta$ -D-galactopyranosyl)- $\alpha$ -D-glucopyranoside (**5i**)**

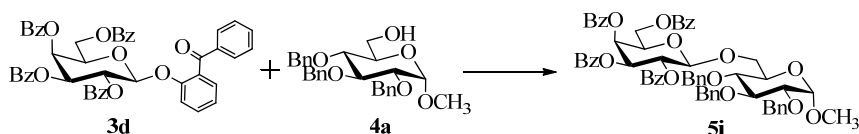

The reaction of donor **3d** (32.6 mg, 0.042 mmol) and acceptor **4a** (16.3 mg, 0.035 mmol) was performed as described in the synthesis of **5a**, affording **5i** (eluent: petroleum ether/ethyl acetate = 5: 1 (v/v); 29.2 mg, 80%). The <sup>1</sup>H NMR data for **5i** are in accordance with those reported previously.<sup>3</sup> <sup>1</sup>H NMR (400 MHz, CDCl<sub>3</sub>)  $\delta$  8.08 (d,  $J$  = 7.6 Hz, 2H), 8.01 (d,  $J$  = 7.7 Hz, 2H), 7.88 (d,  $J$  = 7.8 Hz, 2H), 7.76 (d,  $J$  = 7.7 Hz, 2H), 7.65 – 7.18 (m, 25H), 7.16 – 7.08 (m, 2H), 5.97 (d,  $J$  = 3.3 Hz, 1H), 5.84 (dd,  $J$  = 10.1, 8.2 Hz, 1H), 5.59 (dd,  $J$  = 10.4, 3.4 Hz, 1H), 4.89 (d,  $J$  = 10.9 Hz, 1H), 4.77 – 4.72 (m, 1H), 4.72 – 4.63 (m, 3H), 4.58 (d,  $J$  = 9.0 Hz, 1H), 4.55 (d,  $J$  = 8.3 Hz, 1H), 4.49 (d,  $J$  = 3.4 Hz, 1H), 4.43 – 4.34 (m, 2H), 4.27 – 4.17 (m, 2H), 3.89 (t,  $J$  = 9.2 Hz, 1H), 3.75 (d,  $J$  = 8.8 Hz, 2H), 3.42 –



3.32 (m, 2H), 3.20 (s, 3H).

**Methyl 2,3,6-tri-*O*-benzyl-4-*O*-(2,3,4,6-tetra-*O*-benzoyl- $\beta$ -D-galactopyranosyl)- $\alpha$ -D-glucopyranoside (**5j**)**

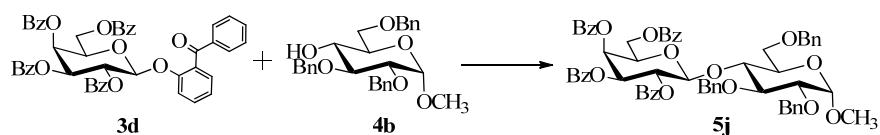

The reaction of donor **3d** (32.6 mg, 0.042 mmol) and acceptor **4b** (16.3 mg, 0.035 mmol) was performed as described in the synthesis of **5a**, affording **5j** (eluent: petroleum ether/ethyl acetate = 4: 1 (v/v); 24.8 mg, 68%). The  $^1\text{H}$  NMR data for **5j** are in accordance with those reported previously.<sup>3</sup>  $^1\text{H}$  NMR (400 MHz,  $\text{CDCl}_3$ )  $\delta$  8.02 (d,  $J$  = 7.3 Hz, 2H), 7.94 (d,  $J$  = 7.4 Hz, 2H), 7.85 (d,  $J$  = 7.4 Hz, 2H), 7.76 (d,  $J$  = 7.4 Hz, 2H), 7.59 – 7.13 (m, 27H), 5.85 (d,  $J$  = 3.2 Hz, 1H), 5.70 (dd,  $J$  = 10.2, 8.2 Hz, 1H), 5.30 (dd,  $J$  = 10.4, 3.4 Hz, 1H), 5.18 (d,  $J$  = 11.1 Hz, 1H), 4.91 (d,  $J$  = 11.1 Hz, 1H), 4.82 – 4.73 (m, 3H), 4.64 (d,  $J$  = 12.3 Hz, 1H), 4.58 (d,  $J$  = 3.6 Hz, 1H), 4.40 (dd,  $J$  = 11.2, 6.2 Hz, 1H), 4.32 (d,  $J$  = 12.2 Hz, 1H), 4.18 (dd,  $J$  = 11.1, 7.8 Hz, 1H), 4.03 (t,  $J$  = 9.4 Hz, 1H), 3.91 (dd,  $J$  = 11.9, 6.4 Hz, 2H), 3.70 (dd,  $J$  = 10.7, 2.4 Hz, 1H), 3.56 – 3.48 (m, 2H), 3.43 (d,  $J$  = 9.7 Hz, 1H), 3.30 (s, 3H).

**Methyl 2,3,6-tri-*O*-benzyl-4-*O*-(2,3,4,6-tetra-*O*-benzoyl- $\alpha$ -D-mannopyranosyl)- $\alpha$ -D-glucopyranoside (**5k**)**

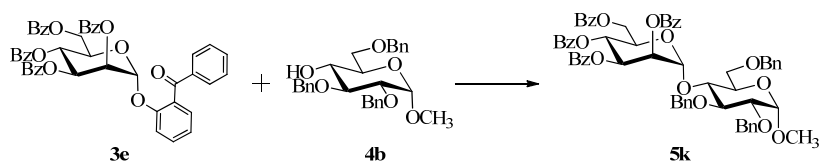

The reaction of donor **3e** (32.6 mg, 0.042 mmol) and acceptor **4b** (16.3 mg, 0.035 mmol) was performed as described in the synthesis of **5a**, affording **5k** (eluent: petroleum ether/ethyl acetate = 5: 1 (v/v); 25.6 mg, 63%). The  $^1\text{H}$  NMR data for **5k** are in accordance with those reported previously.<sup>3</sup>  $^1\text{H}$  NMR (400 MHz,  $\text{CDCl}_3$ )  $\delta$  8.07 (d,  $J$  = 7.6 Hz, 2H), 7.92 (t,  $J$  = 6.7 Hz, 4H), 7.79 (d,  $J$  = 7.7 Hz, 2H), 7.63 – 7.48 (m, 3H), 7.46 – 7.18 (m, 20H), 7.12 (t,  $J$  = 7.3 Hz, 1H), 7.02 (t,  $J$  = 7.2 Hz, 2H), 6.99 – 6.92 (m, 1H), 6.03 (t,  $J$  = 10.1 Hz, 1H), 5.85 (d,  $J$  = 9.9 Hz, 1H), 5.72 (s, 1H), 5.60 (s, 1H), 5.06 (d,  $J$  = 10.9 Hz, 1H), 4.85 (d,  $J$  = 11.0 Hz, 1H), 4.74 (d,  $J$  = 12.2 Hz, 1H), 4.65 – 4.52 (m, 4H), 4.46 (d,  $J$  = 12.1 Hz, 1H), 4.34 (d,  $J$  = 9.8 Hz, 1H), 4.23 (d,  $J$  = 12.3 Hz, 1H), 4.09 (t,  $J$  = 8.4 Hz, 1H), 3.97 – 3.82 (m, 3H), 3.77 (d,  $J$  = 10.4 Hz, 1H), 3.56 (d,  $J$  = 9.4 Hz, 1H), 3.44 (s, 3H).

**Methyl 2,4,6-tri-*O*-benzyl-3-*O*-(2,3,4,6-tetra-*O*-benzoyl- $\alpha$ -D-mannopyranosyl)- $\alpha$ -D-glucopyranoside (**5l**)**

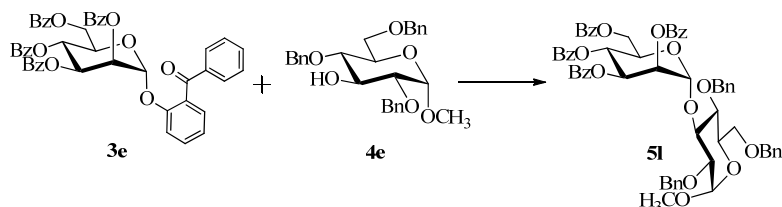

The reaction of donor **3e** (32.6 mg, 0.042 mmol) and acceptor **4e** (16.3 mg, 0.035 mmol) was performed as described in the synthesis of **5a**, affording **5l** (eluent: petroleum ether/ethyl acetate = 4: 1 (v/v); 28.4 mg, 70%). The  $^1\text{H}$  NMR data for **5l** are in accordance with those reported previously.<sup>3</sup>  $^1\text{H}$  NMR (400 MHz,  $\text{CDCl}_3$ )  $\delta$  8.13 (d,  $J$  =

7.5 Hz, 2H), 7.94 (d,  $J = 7.5$  Hz, 2H), 7.83 (t,  $J = 7.6$  Hz, 4H), 7.56 (t,  $J = 7.2$  Hz, 2H), 7.53 – 7.15 (m, 20H), 7.09 – 7.02 (m, 5H), 6.04 (t,  $J = 10.1$  Hz, 1H), 5.94 (d,  $J = 10.3$  Hz, 1H), 5.82 (s, 1H), 5.57 (s, 1H), 4.91 – 4.61 (m, 6H), 4.52 (dd,  $J = 11.4, 6.6$  Hz, 2H), 4.44 (d,  $J = 12.2$  Hz, 1H), 4.31 (t,  $J = 9.1$  Hz, 1H), 3.98 (d,  $J = 12.2$  Hz, 1H), 3.82 (t,  $J = 9.1$  Hz, 1H), 3.75 (d,  $J = 9.2$  Hz, 2H), 3.66 (d,  $J = 9.7$  Hz, 2H), 3.39 (s, 3H).

**Methyl 2,3,6-tri-*O*-benzyl-4-*O*-(2,3,4-tri-*O*-benzoyl- $\alpha$ -L-rhamnopyranosyl)- $\alpha$ -D-glucopyranoside (5m)**

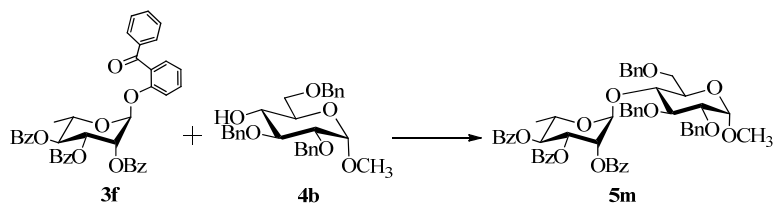

The reaction of donor **3f** (27.6 mg, 0.042 mmol) and acceptor **4b** (16.3 mg, 0.035 mmol) was performed as described in the synthesis of **5a**, affording **5m** (eluent: petroleum ether/ethyl acetate = 5: 1 (v/v); 22.6 mg, 70%). The  $^1\text{H}$  NMR data for **5m** are in accordance with those reported previously.<sup>3</sup>  $^1\text{H}$  NMR (400 MHz,  $\text{CDCl}_3$ )  $\delta$  8.08 – 8.02 (m, 2H), 7.93 – 7.82 (m, 4H), 7.63 – 7.36 (m, 9H), 7.35 – 7.24 (m, 9H), 7.21 – 7.09 (m, 6H), 5.78 (dd,  $J = 10.2$  Hz, 3.4 Hz, 1H), 5.64 – 5.54 (m, 2H), 5.21 (d,  $J = 10.6$  Hz, 2H), 4.85 (d,  $J = 11.1$  Hz, 1H), 4.76 (d,  $J = 12.1$  Hz, 1H), 4.68 – 4.51 (m, 4H), 4.41 – 4.32 (m, 1H), 4.05 – 3.94 (m, 2H), 3.89 (dd,  $J = 11.1$  Hz, 2.5 Hz, 1H), 3.84 (d,  $J = 9.2$  Hz, 1H), 3.73 (d,  $J = 9.8$  Hz, 1H), 3.65 (dd,  $J = 9.0$  Hz, 3.5 Hz, 1H), 3.41 (s, 3H), 0.88 (d,  $J = 6.2$  Hz, 3H).

**Methyl 2,4,6-tri-*O*-benzyl-3-*O*-(2,3,4-tri-*O*-benzoyl- $\alpha$ -L-rhamnopyranosyl)- $\alpha$ -D-glucopyranoside (5n)**

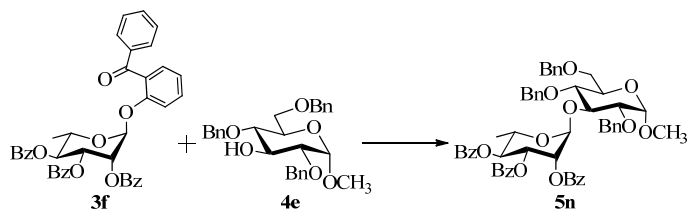

The reaction of donor **3f** (27.6 mg, 0.042 mmol) and acceptor **4e** (16.3 mg, 0.035 mmol) was performed as described in the synthesis of **5a**, affording **5n** (eluent: petroleum ether/ethyl acetate = 5: 1 (v/v); 26.7 mg, 81%). The  $^1\text{H}$  NMR data for **5n** are in accordance with those reported previously.<sup>3</sup>  $^1\text{H}$  NMR (400 MHz,  $\text{CDCl}_3$ )  $\delta$  8.05 (d,  $J = 8.2$  Hz, 2H), 7.83 (d,  $J = 8.2$  Hz, 2H), 7.77 (d,  $J = 8.2$  Hz, 2H), 7.59 (t,  $J = 7.4$  Hz, 1H), 7.53 – 7.09 (m, 23H), 5.89 – 5.80 (m, 2H), 5.70 (s, 1H), 5.60 (t,  $J = 10.0$  Hz, 1H), 4.98 (d,  $J = 11.3$  Hz, 1H), 4.81 (d,  $J = 12.1$  Hz, 1H), 4.69 – 4.59 (m, 4H), 4.52 (d,  $J = 12.0$  Hz, 1H), 4.41 – 4.34 (m, 1H), 4.28 (t,  $J = 9.3$  Hz, 1H), 3.81 (d,  $J = 9.1$  Hz, 2H), 3.76 – 3.61 (m, 3H), 3.33 (s, 3H), 1.06 (d,  $J = 6.1$  Hz, 3H).

**Cholesteryl 2,3,4,6-tetra-*O*-benzoyl- $\beta$ -D-galactopyranoside (5o)**

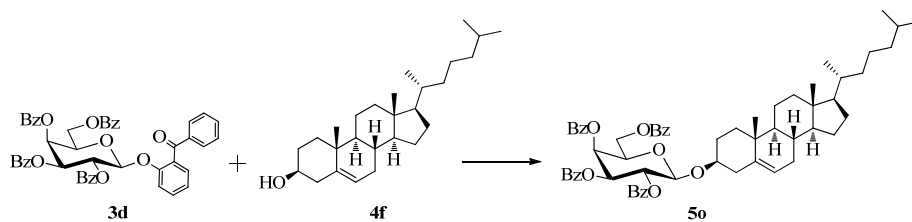

The reaction of donor **3d** (32.6 mg, 0.042 mmol) and acceptor **4f** (13.5 mg, 0.035 mmol) was performed as

described in the synthesis of **5a**, affording **5o** (eluent: petroleum ether/ethyl acetate = 5: 1 (v/v); 27.0 mg, 80%). The <sup>1</sup>H NMR data for **5o** are in accordance with those reported previously.<sup>3</sup> <sup>1</sup>H NMR (400 MHz, CDCl<sub>3</sub>) δ 8.10 (d, *J* = 7.4 Hz, 2H), 8.02 (d, *J* = 7.5 Hz, 2H), 7.96 (d, *J* = 7.5 Hz, 2H), 7.79 (d, *J* = 7.6 Hz, 2H), 7.65 – 7.35 (m, 11H), 7.23 (d, *J* = 7.8 Hz, 1H), 5.98 (d, *J* = 3.4 Hz, 1H), 5.77 (dd, *J* = 10.2, 8.0 Hz, 1H), 5.59 (dd, *J* = 10.5, 3.1 Hz, 1H), 5.27 – 5.18 (m, 1H), 4.91 (d, *J* = 8.0 Hz, 1H), 4.67 (dd, *J* = 11.0, 6.9 Hz, 1H), 4.42 (dd, *J* = 11.1, 6.4 Hz, 1H), 4.32 (t, *J* = 6.7 Hz, 1H), 3.62 – 3.49 (m, 1H), 2.18 (d, *J* = 7.7 Hz, 2H), 2.05 – 0.80 (m, 41H), 0.66 (s, 3H).

**(1R, 2S, 5R)-(-)-1-Menthyl 2,3,4,6-tetra-*O*-benzoyl-β-D-galactopyranoside (5p)**

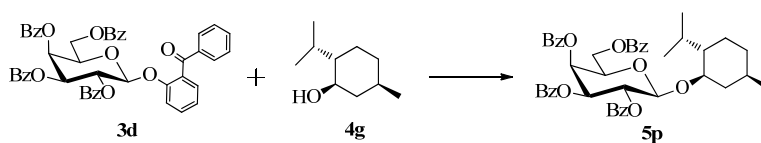

The reaction of donor **3d** (27.6 mg, 0.042 mmol) and acceptor **4g** (5.4 mg, 0.035 mmol) was performed as described in the synthesis of **5a**, affording **5p** (eluent: petroleum ether/ethyl acetate = 5: 1 (v/v); 20.8 mg, 81%). The <sup>1</sup>H NMR data for **5p** are in accordance with those reported previously.<sup>3</sup> <sup>1</sup>H NMR (400 MHz, CDCl<sub>3</sub>) δ 8.12 – 8.07 (m, 2H), 8.04 – 8.00 (m, 2H), 7.99 – 7.95 (m, 2H), 7.82 – 7.77 (m, 2H), 7.65 – 7.35 (m, 10H), 7.27 – 7.22 (m, 2H), 5.98 (d, *J* = 3.4 Hz, 1H), 5.74 (dd, *J* = 10.3, 8.0 Hz, 1H), 5.58 (dd, *J* = 10.4, 3.4 Hz, 1H), 4.87 (d, *J* = 7.9 Hz, 1H), 4.62 (dd, *J* = 11.3, 6.7 Hz, 1H), 4.42 (dd, *J* = 11.3, 6.3 Hz, 1H), 4.29 (t, *J* = 6.5 Hz, 1H), 3.48 (td, *J* = 10.7, 4.3 Hz, 1H), 2.42 – 2.27 (m, 1H), 1.94 (d, *J* = 12.3 Hz, 1H), 1.65 – 1.50 (m, 2H), 1.35 – 1.15 (m, 2H), 1.00 – 0.61 (m, 12H).

## 2. <sup>1</sup>H and <sup>13</sup>C NMR Spectra

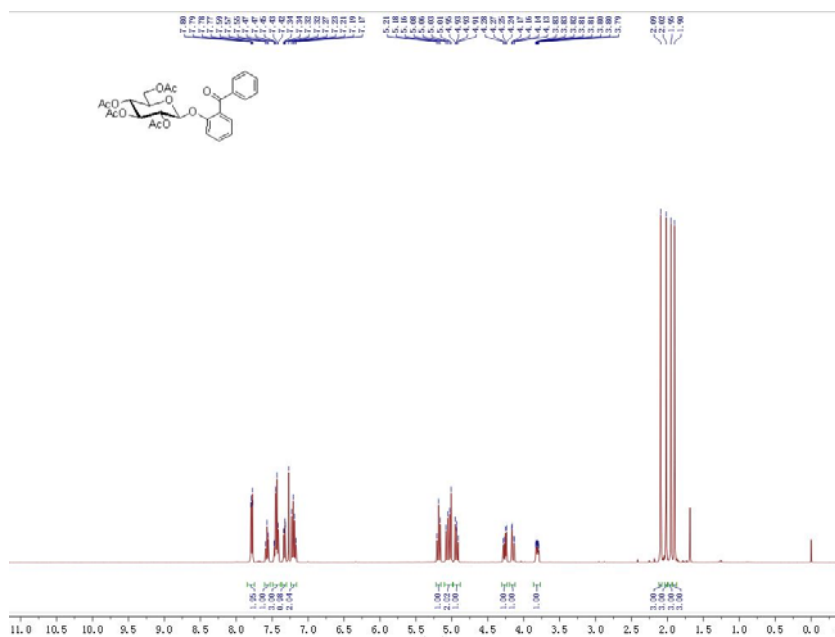

<sup>1</sup>H NMR (400 MHz, CDCl<sub>3</sub>) spectrum of compound 2a

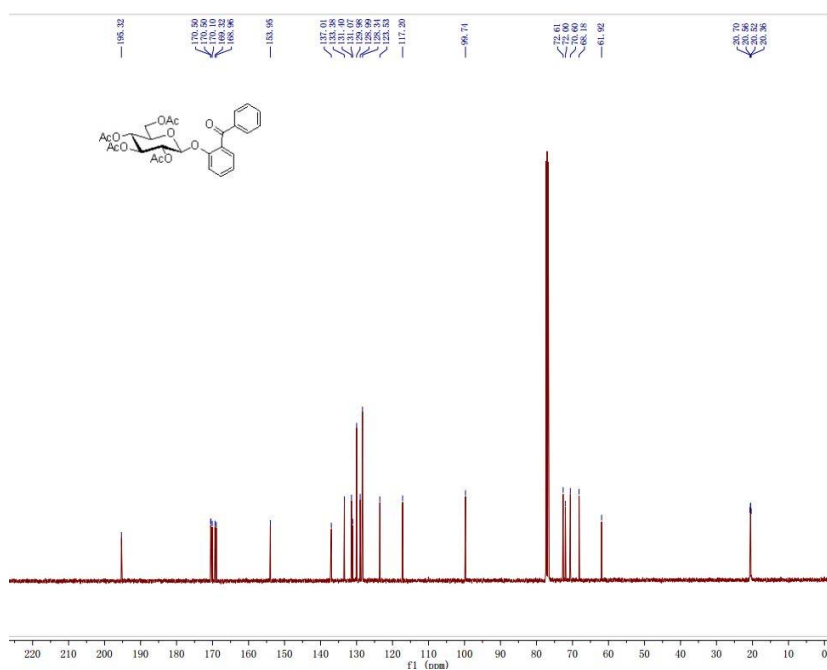

<sup>13</sup>C NMR (101 MHz, CDCl<sub>3</sub>) spectrum of compound 2a

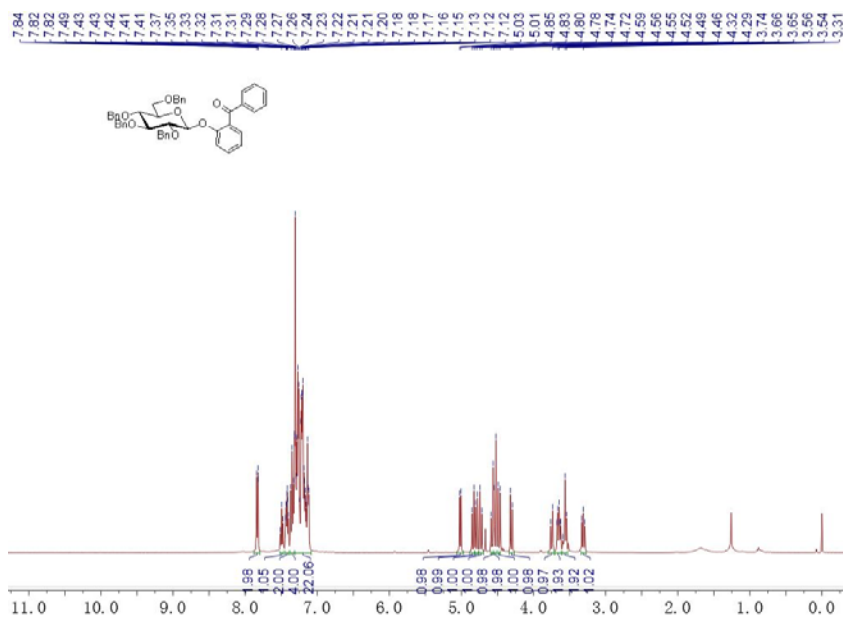

<sup>1</sup>H NMR (400 MHz, CDCl<sub>3</sub>) spectrum of compound 3a

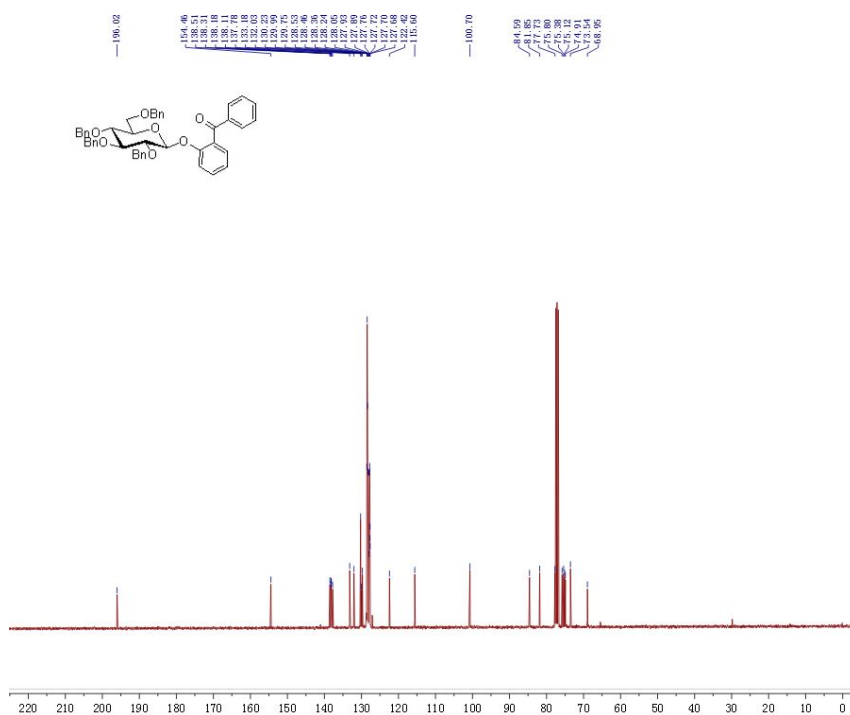

<sup>13</sup>C NMR (101 MHz, CDCl<sub>3</sub>) spectrum of compound 3a

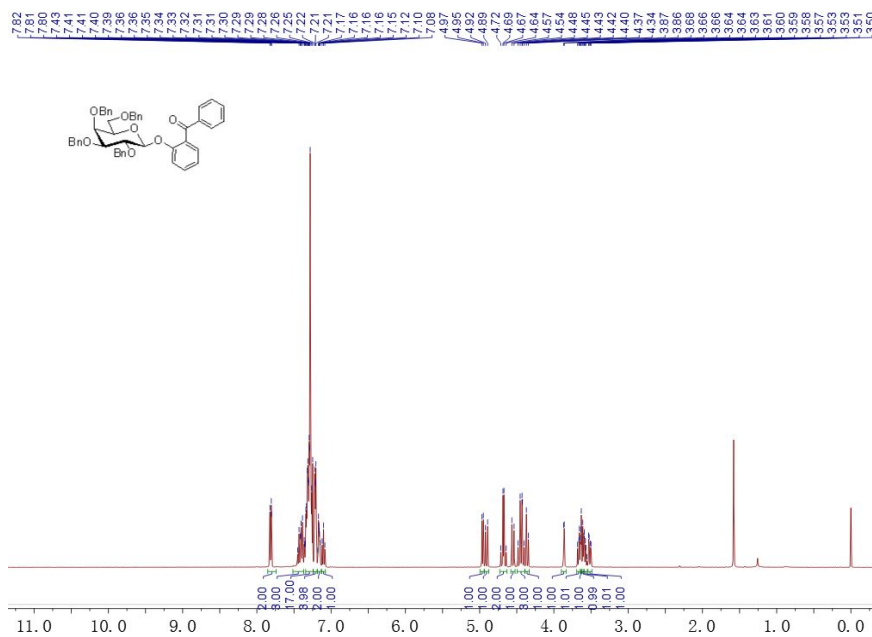

<sup>1</sup>H NMR (400 MHz, CDCl<sub>3</sub>) spectrum of compound 3b

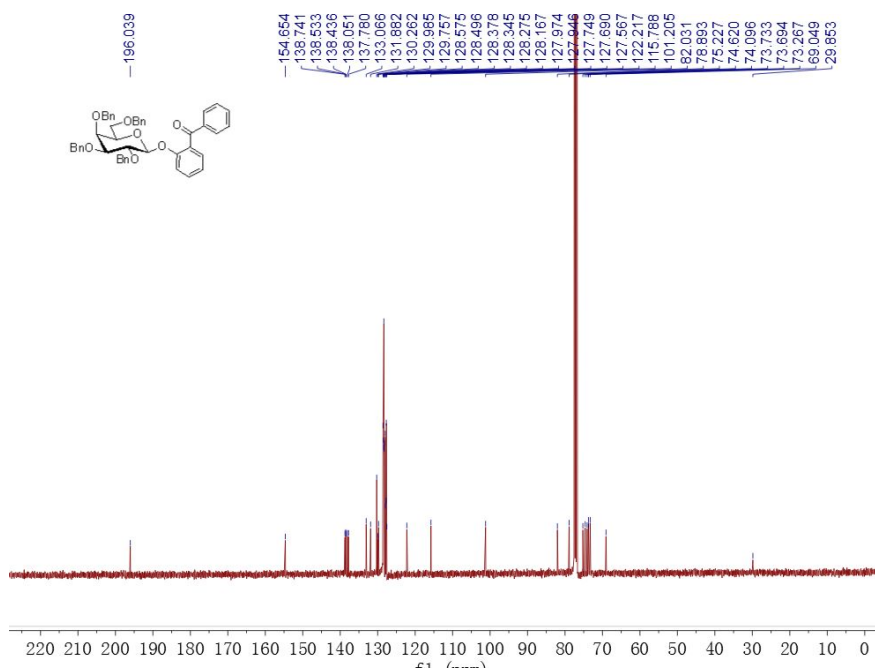

<sup>13</sup>C NMR (101 MHz, CDCl<sub>3</sub>) spectrum of compound 3b

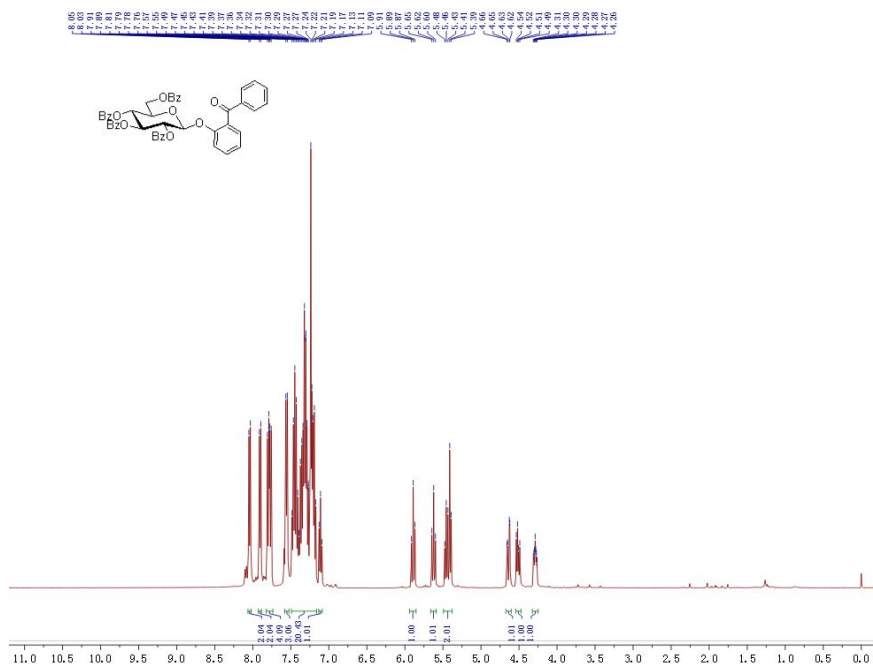

<sup>1</sup>H NMR (400 MHz, CDCl<sub>3</sub>) spectrum of compound 3c

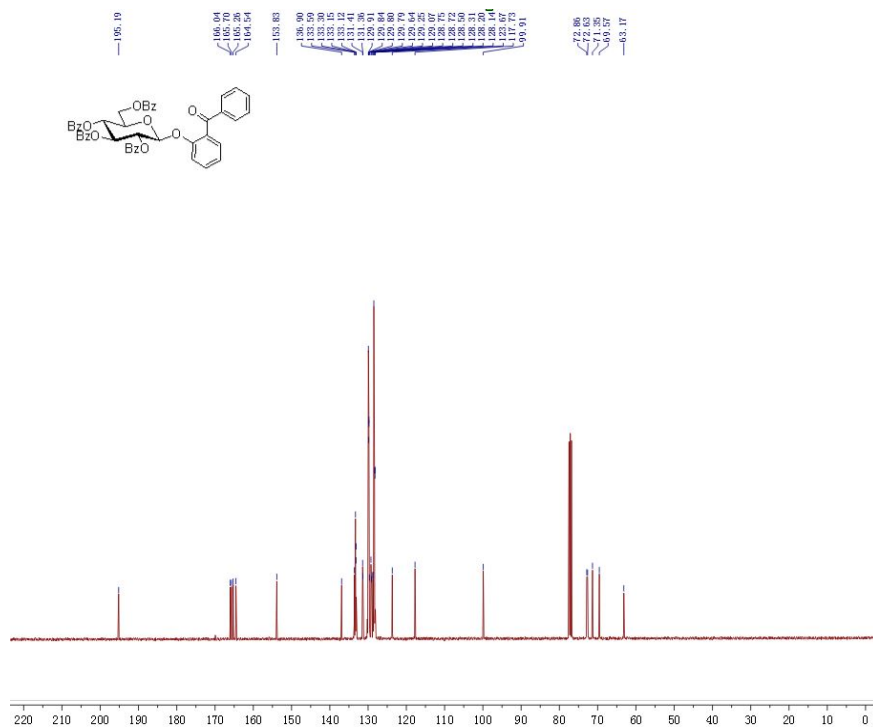

<sup>13</sup>C NMR (101 MHz, CDCl<sub>3</sub>) spectrum of compound 3c

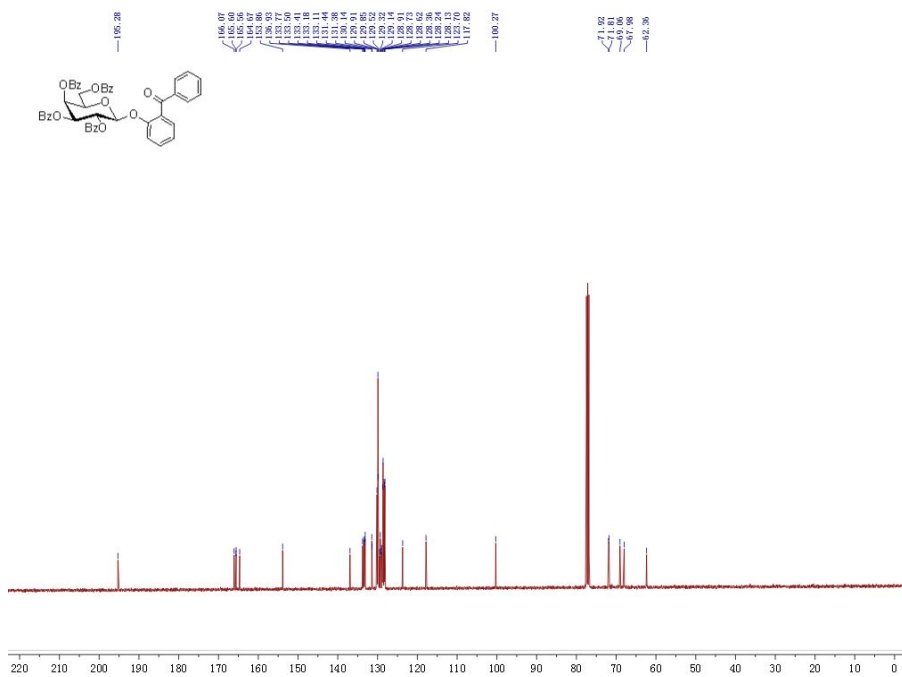

<sup>13</sup>C NMR (101 MHz, CDCl<sub>3</sub>) spectrum of compound 3d

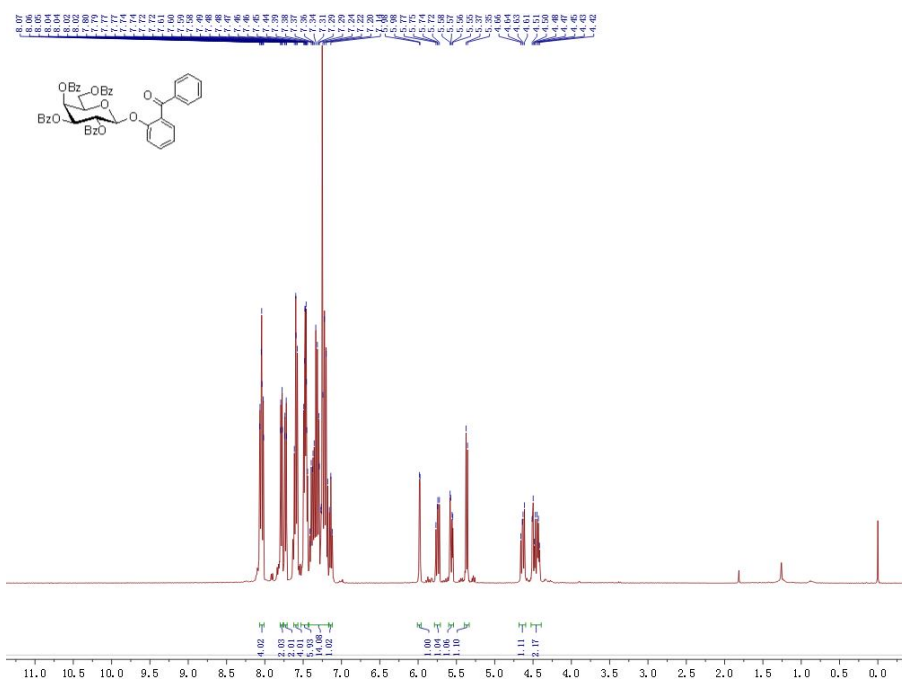

<sup>1</sup>H NMR (400 MHz, CDCl<sub>3</sub>) spectrum of compound 3d



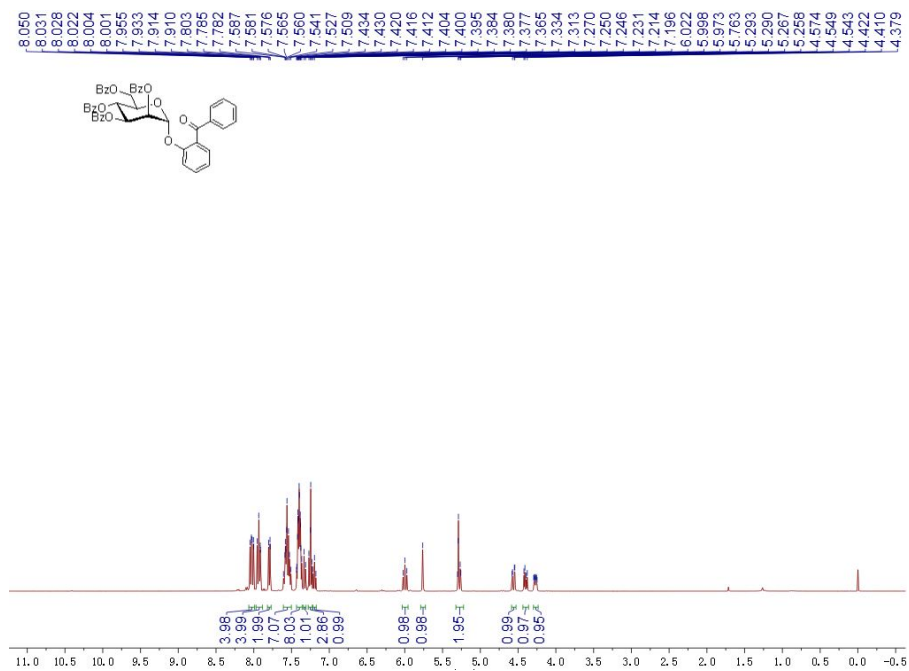

**<sup>1</sup>H NMR (400 MHz, CDCl<sub>3</sub>) spectrum of compound 3e**

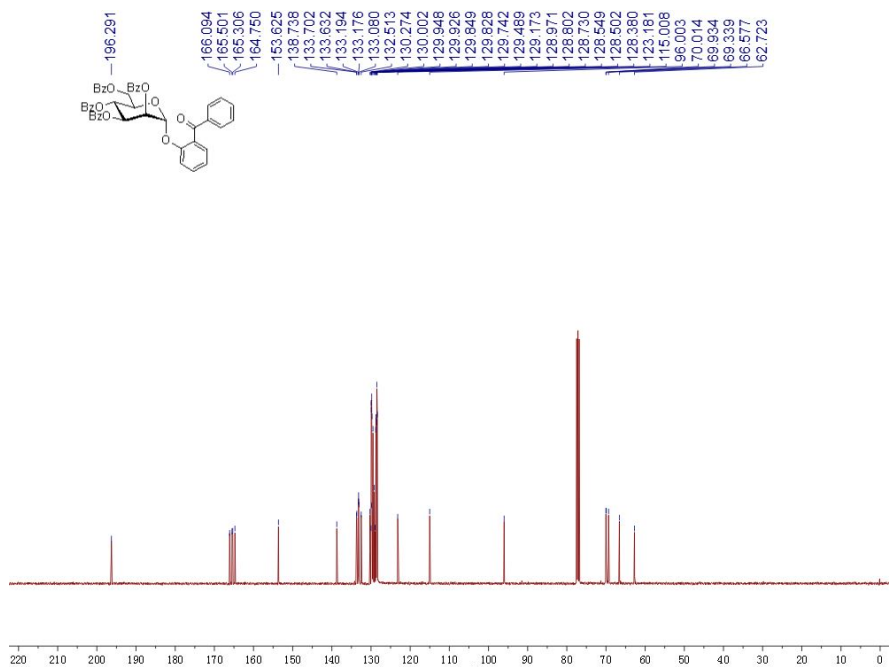

**<sup>13</sup>C NMR (101 MHz, CDCl<sub>3</sub>) spectrum of compound 3e**

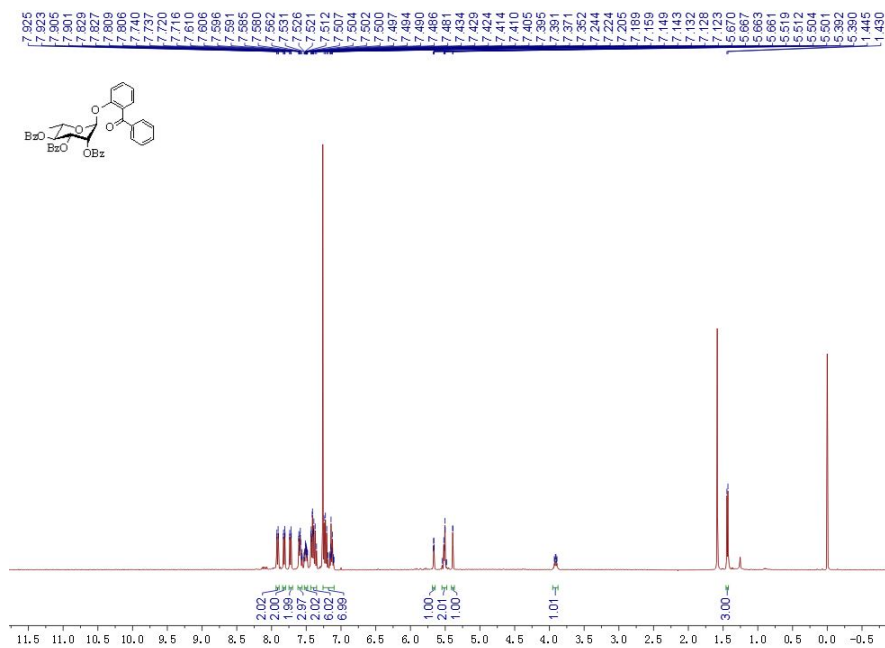

**<sup>1</sup>H NMR (400 MHz, CDCl<sub>3</sub>) spectrum of compound 3f**

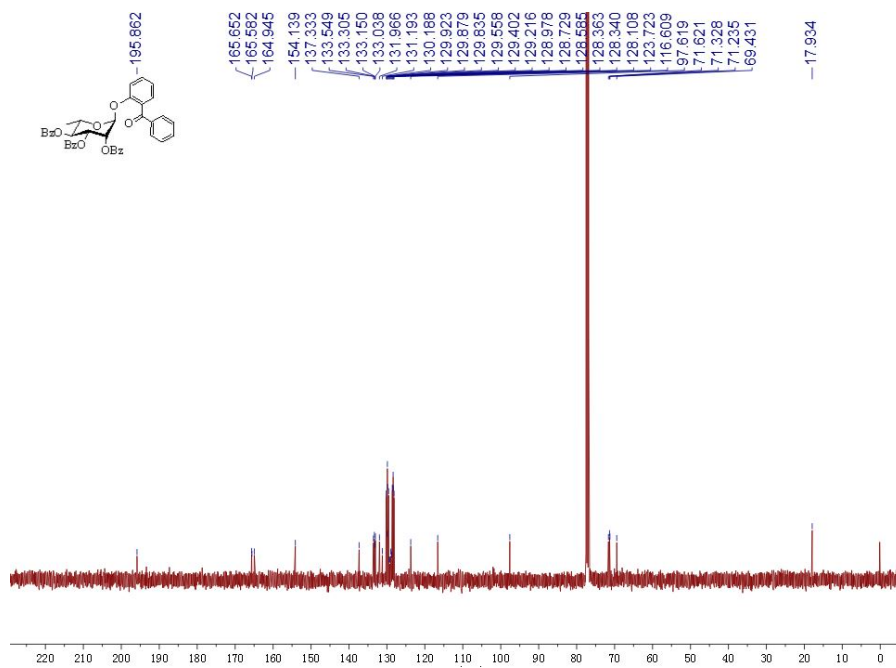

**<sup>13</sup>C NMR (101 MHz, CDCl<sub>3</sub>) spectrum of compound 3f**

将下列数据与所测的谱图对照，以验证其正确性。如有不符，请重新测定。如有必要，请重新测定。如有必要，请重新测定。

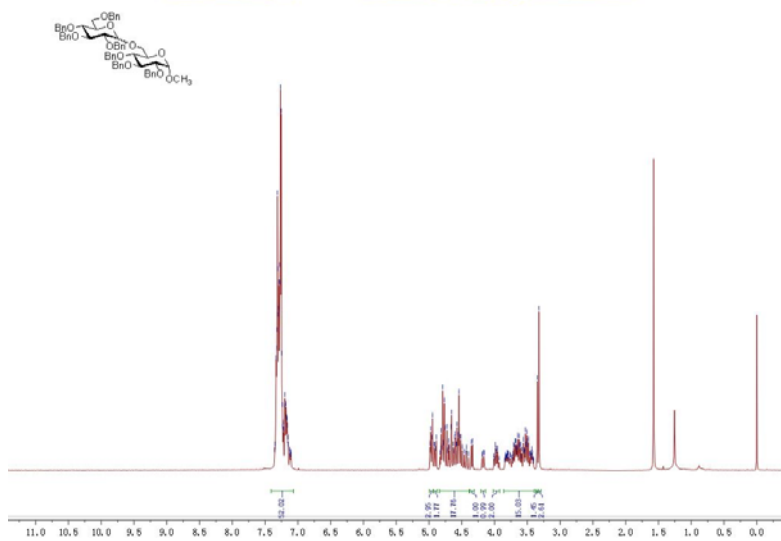

<sup>1</sup>H NMR (400 MHz, CDCl<sub>3</sub>) spectrum of compound 5a ( $\alpha/\beta = 1.8:1.0$ )

将下列数据与所测的谱图对照，以验证其正确性。如有不符，请重新测定。如有必要，请重新测定。如有必要，请重新测定。

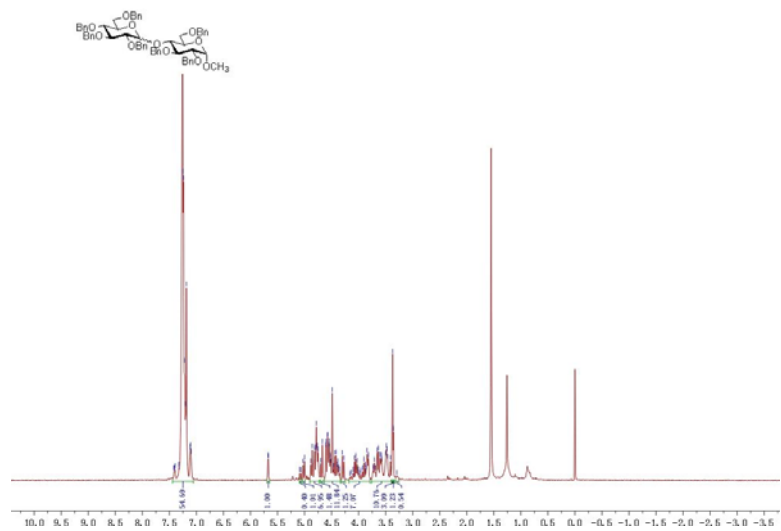

<sup>1</sup>H NMR (400 MHz, CDCl<sub>3</sub>) spectrum of compound 5b ( $\alpha/\beta = 2.5:1.0$ )



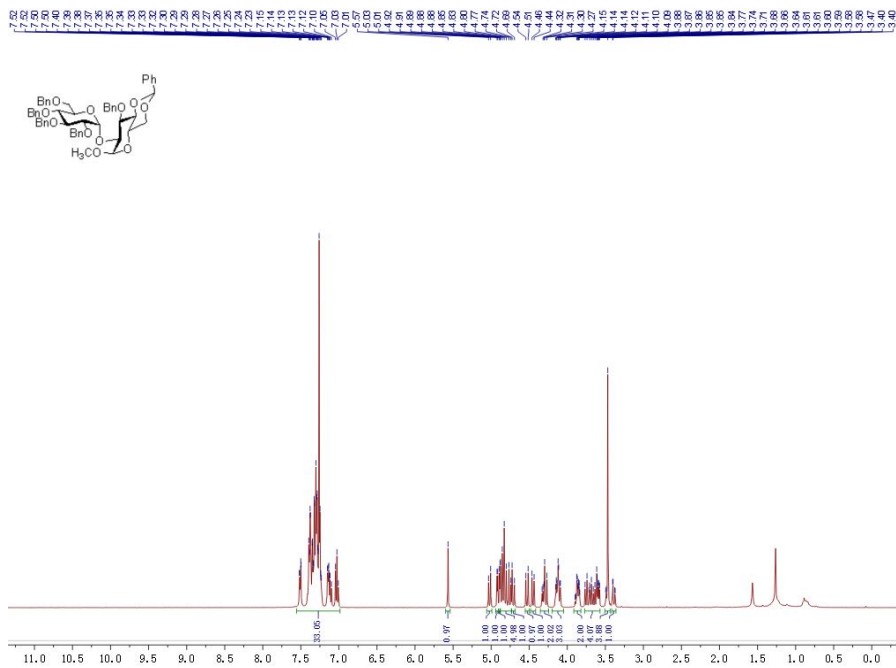

$^1\text{H}$  NMR (400 MHz,  $\text{CDCl}_3$ ) spectrum of compound 5d $\alpha$

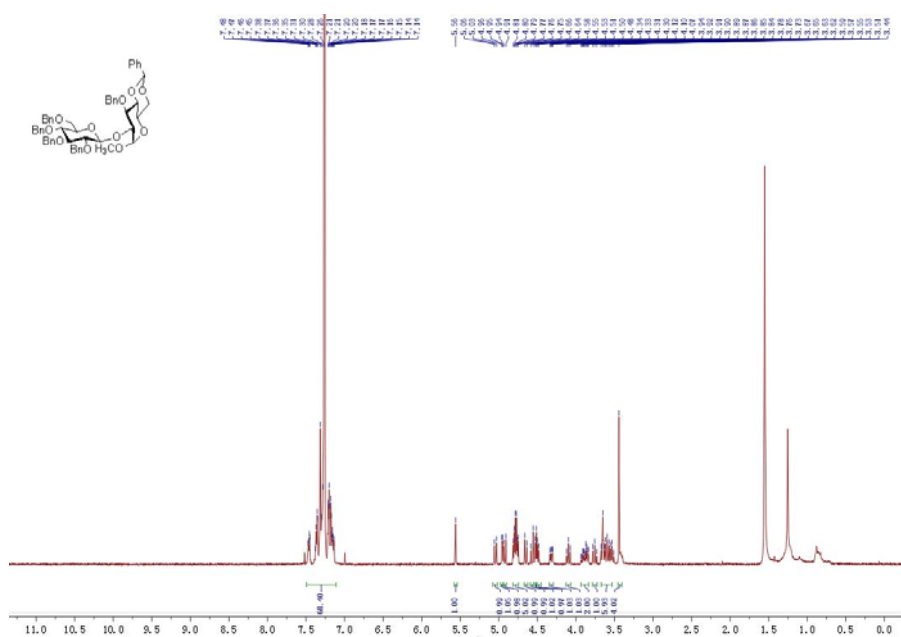

$^1\text{H}$  NMR (400 MHz,  $\text{CDCl}_3$ ) spectrum of compound 5d $\beta$

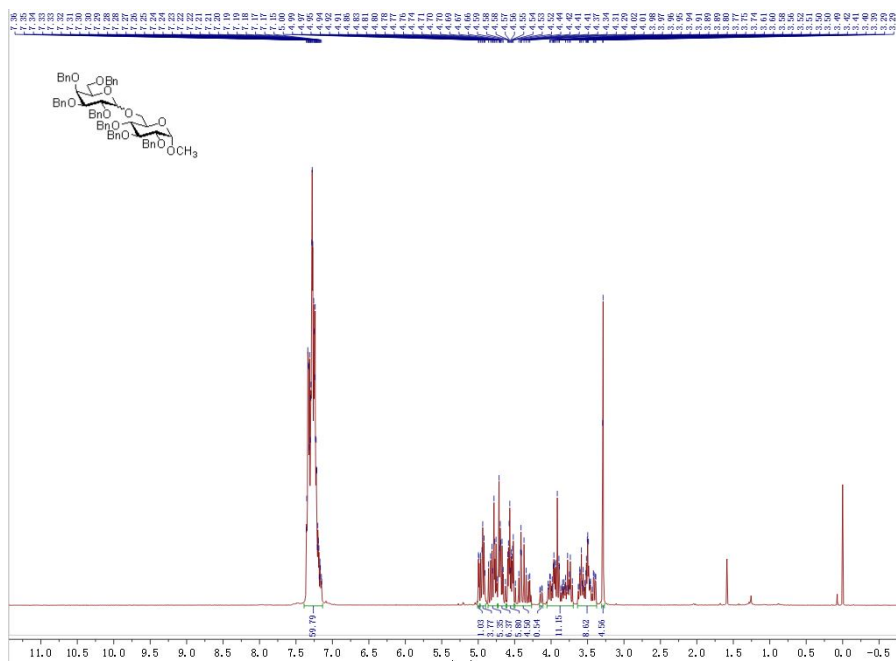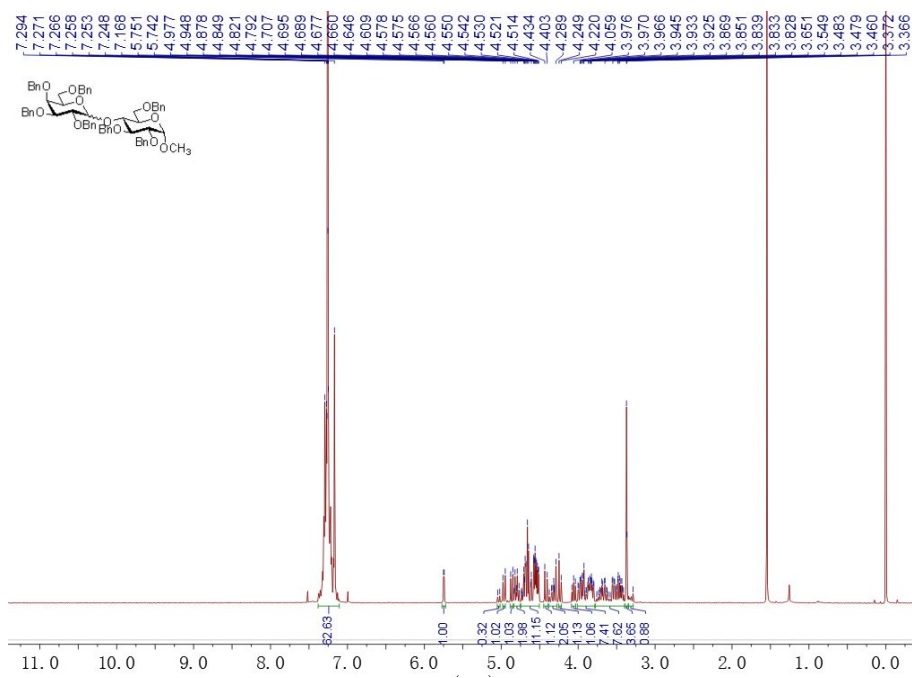

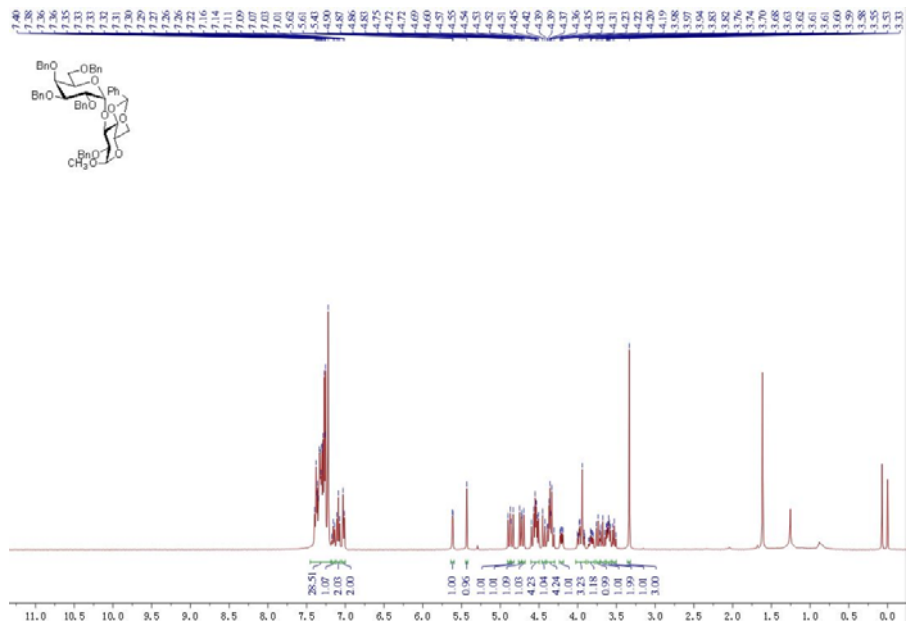

$^1\text{H}$  NMR (400 MHz,  $\text{CDCl}_3$ ) spectrum of compound 5g $\alpha$

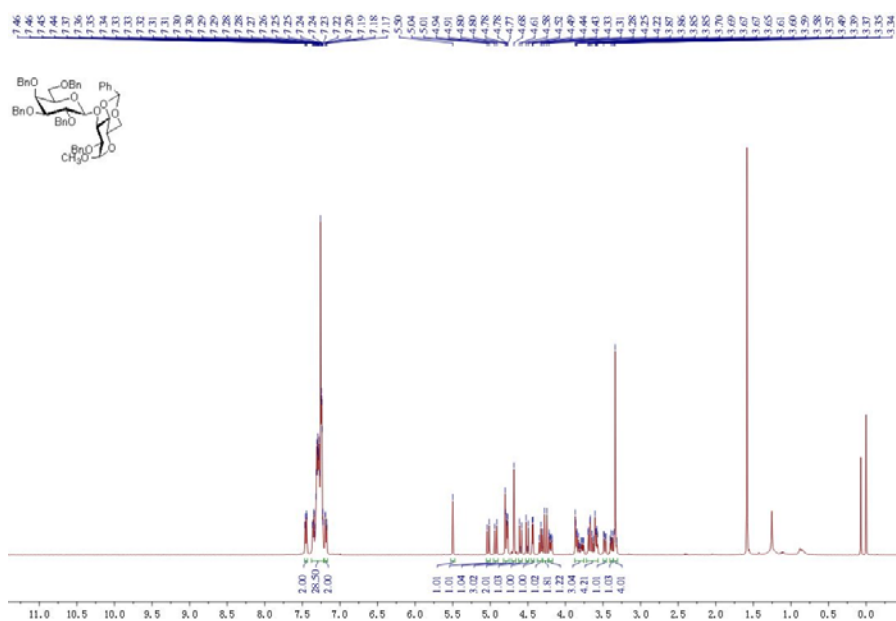

$^1\text{H}$  NMR (400 MHz,  $\text{CDCl}_3$ ) spectrum of compound 5g $\beta$

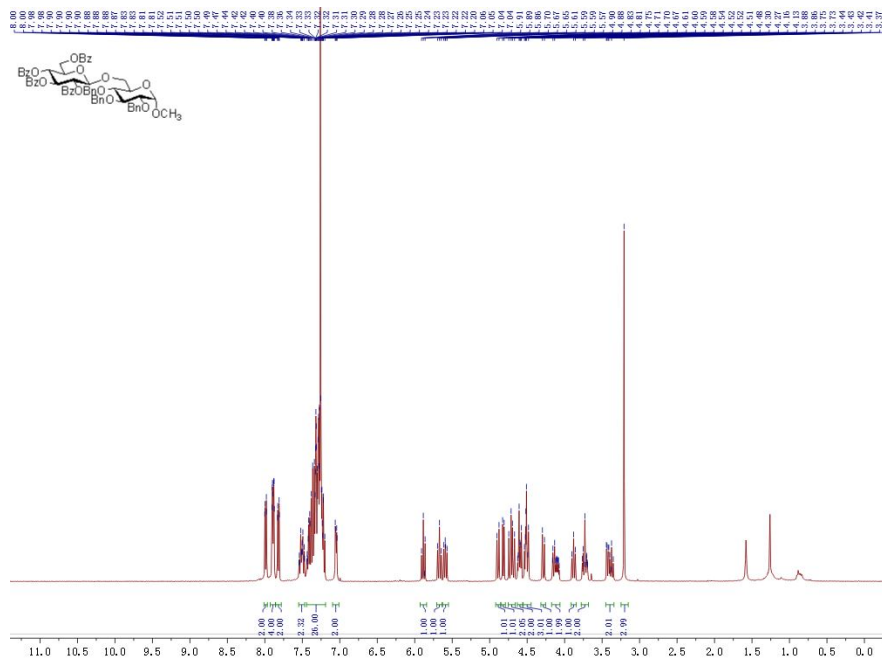

<sup>1</sup>H NMR (400 MHz, CDCl<sub>3</sub>) spectrum of compound 5h

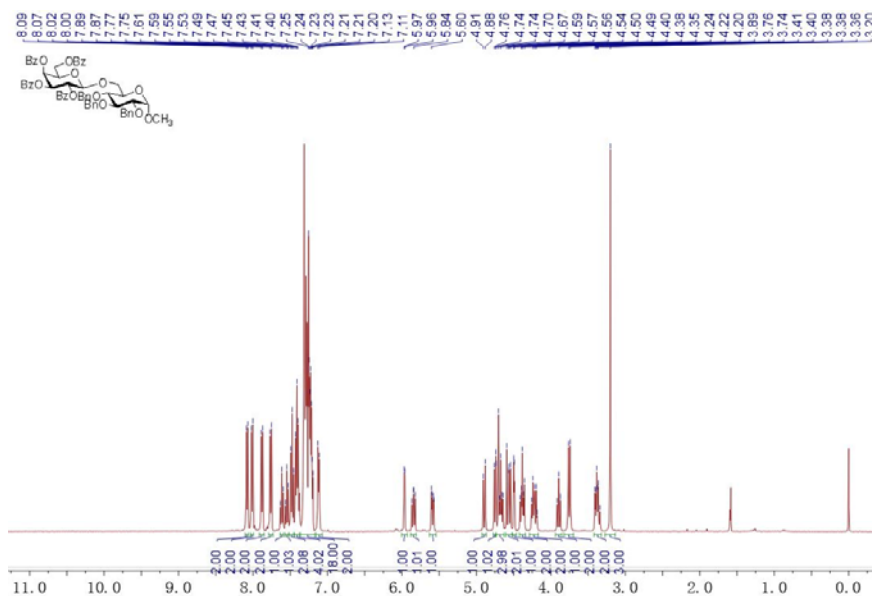

<sup>1</sup>H NMR (400 MHz, CDCl<sub>3</sub>) spectrum of compound 5i



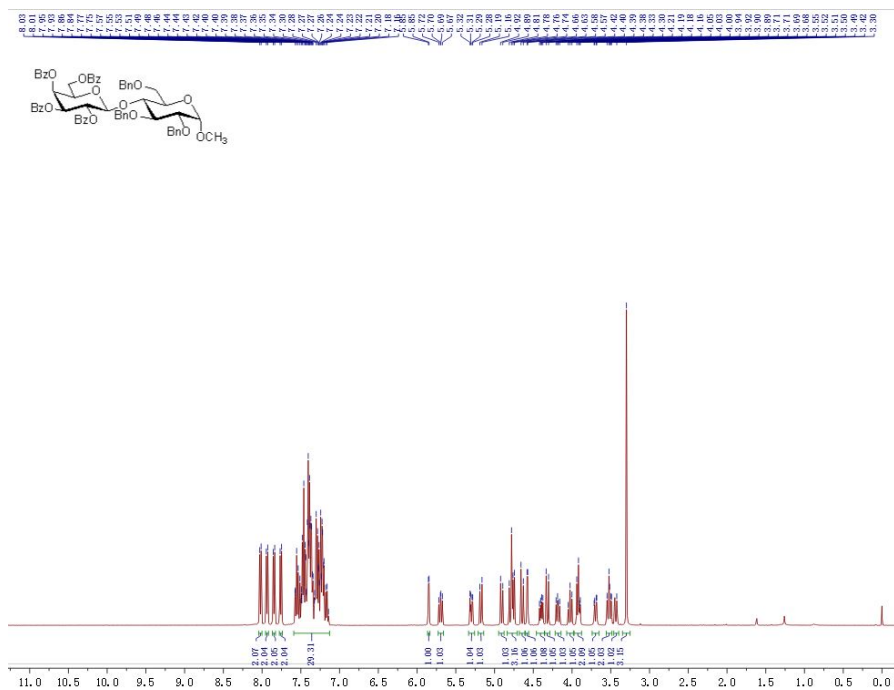

**<sup>1</sup>H NMR (400 MHz, CDCl<sub>3</sub>) spectrum of compound 5j**

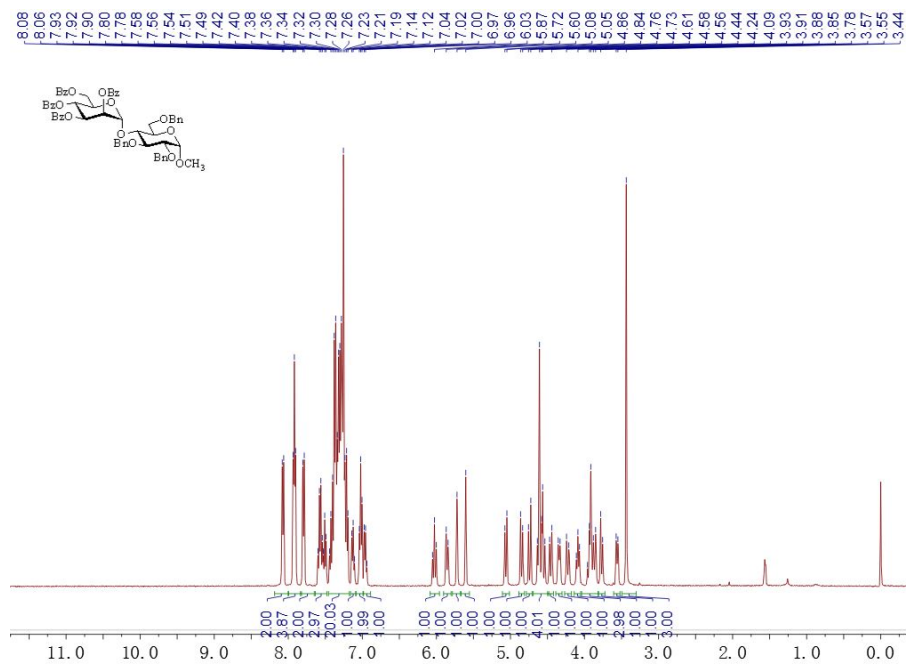

**<sup>1</sup>H NMR (400 MHz, CDCl<sub>3</sub>) spectrum of compound 5k**

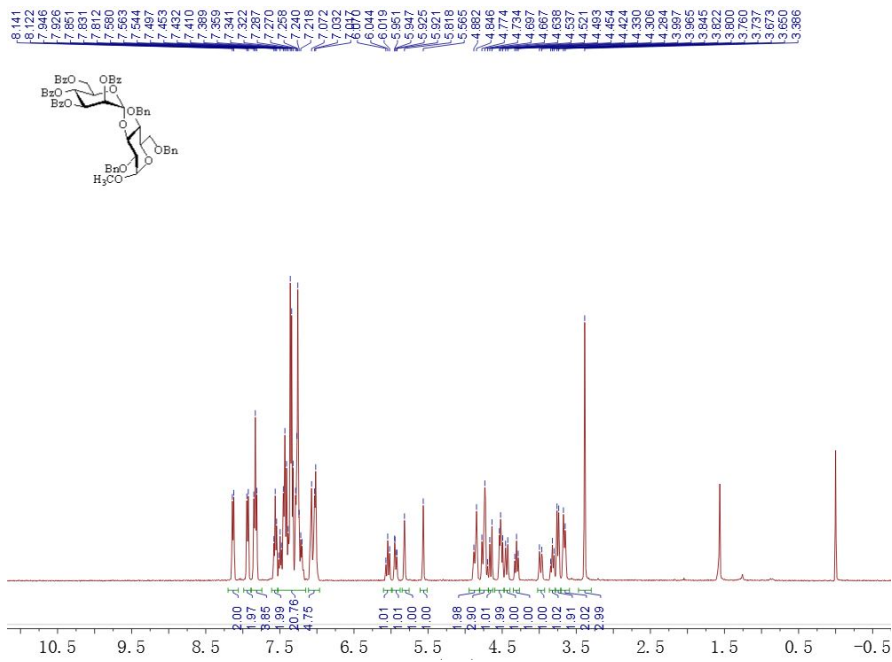

<sup>1</sup>H NMR (400 MHz, CDCl<sub>3</sub>) spectrum of compound 5l

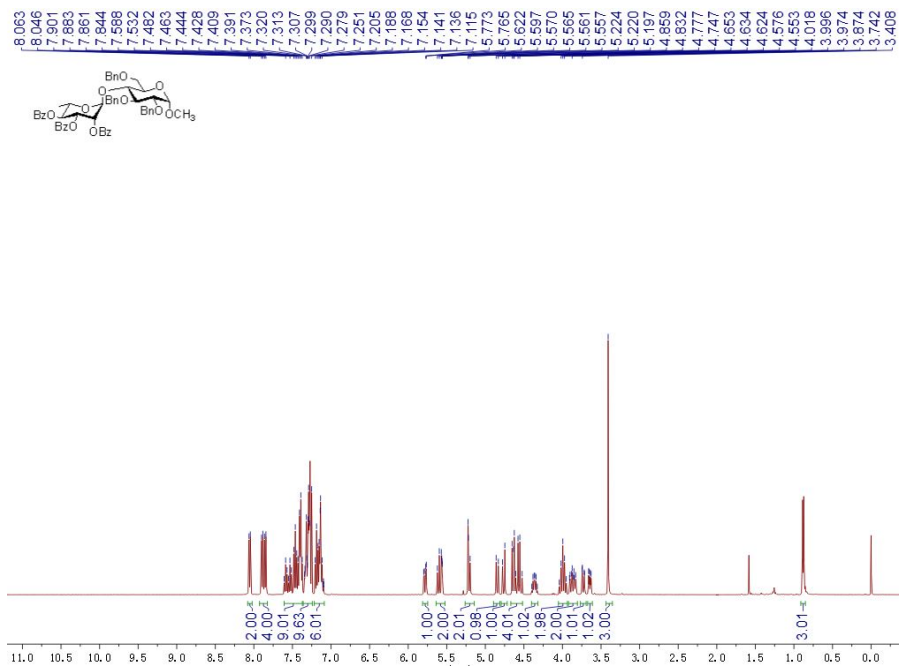

<sup>1</sup>H NMR (400 MHz, CDCl<sub>3</sub>) spectrum of compound 5m

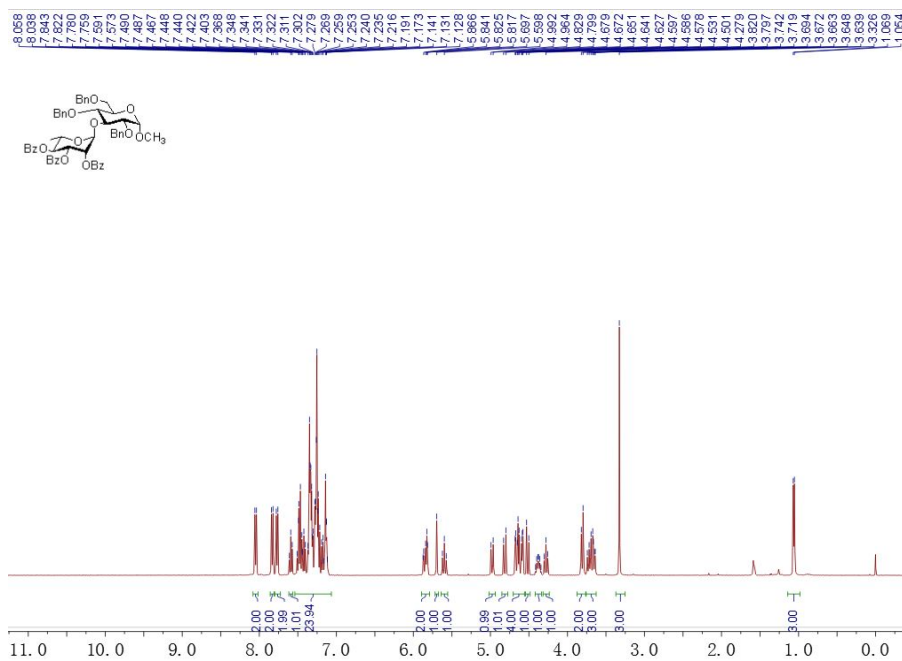

<sup>1</sup>H NMR (400 MHz, CDCl<sub>3</sub>) spectrum of compound 5n

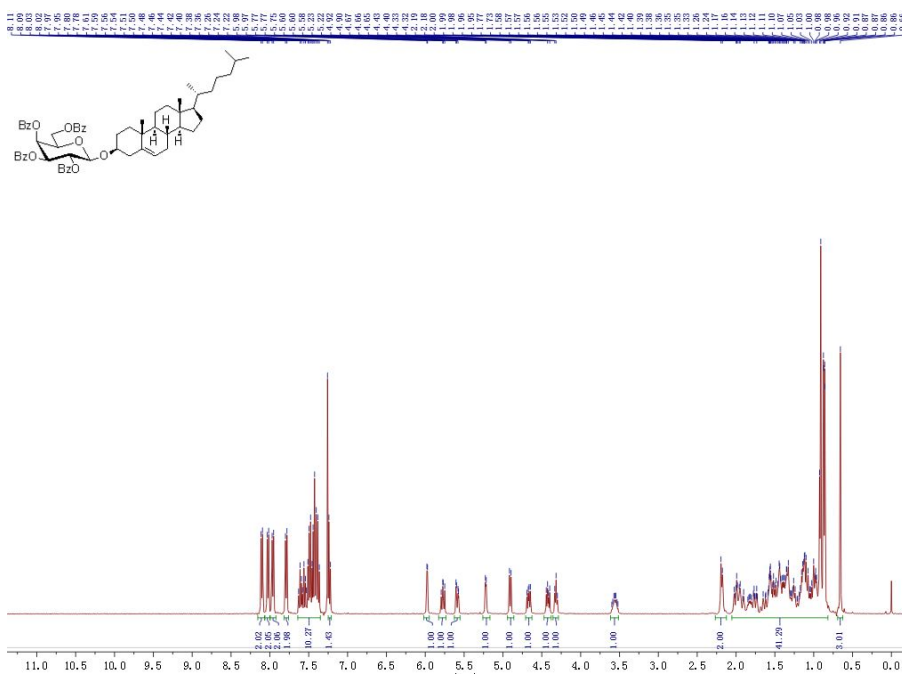

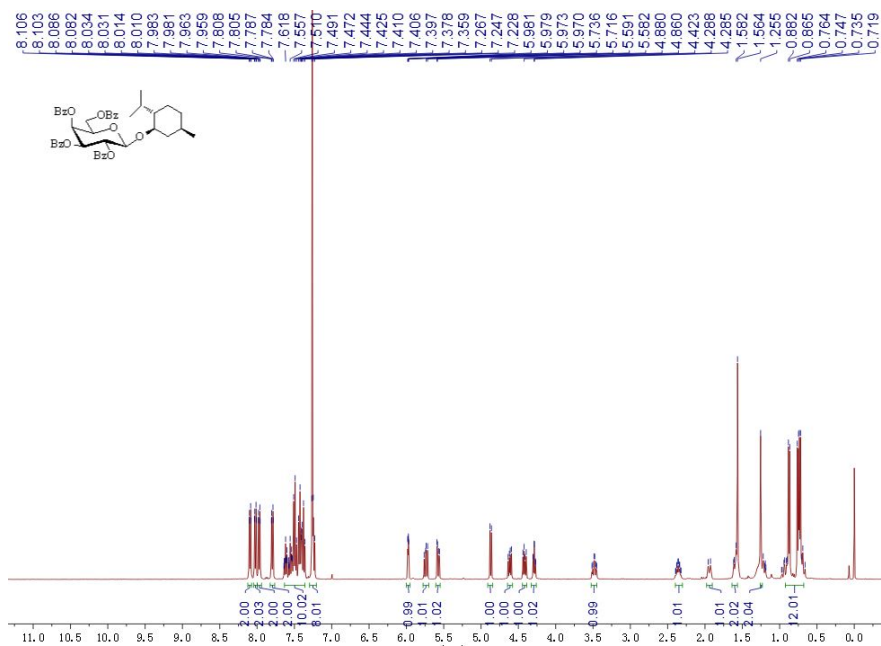

<sup>1</sup>H NMR (400 MHz, CDCl<sub>3</sub>) spectrum of compound 5p

**References:**

1. L. F. Sun, X. W. Wu, D-C. Xiong, X-S. Ye. *Angew. Chem., Int. Ed.* **2016**, *55*, 8041-8044.
2. D-C Xiong, L-H. Zhang, X-S. Ye. *Adv. Synth. Catal.* **2008**, *350*, 1696-1700.
3. M. Liu, B-H. Li, D-C. Xiong, X-S. Ye. *J. Org. Chem.* **2018**, *83*, 8292-8303.
